# Supplementary material for: Enhanced resistance to bacterial and oomycete pathogens by short tandem target mimic RNAs in tomato
Source: PubMed Central journal article supplement — Proc Natl Acad Sci U S A. 2019 Jan 24;116(7):2755–60. doi: 10.1073/pnas.1814380116 (PMC6377479; doi:10.1073/pnas.1814380116), 2019-01-24
Supplement: pnas.1814380116.sapp.pdf [file pnas.1814380116.sapp.pdf]

1

## 2 **Supplementary Information for**

### 3 **Enhanced resistance to bacterial and oomycete pathogens by short tandem target mimic** 4 **RNAs in tomato**

5 **A. Canto-Pastor, BAMC. Santos, AA. Valli, W. Summers, S. Schornack, DC. Baulcombe**

6 **DC. Baulcombe.**

7 **E-mail: [dcb40@cam.ac.uk](mailto:dcb40@cam.ac.uk)**

#### 8 **This PDF file includes:**

9 Figs. S1 to S8

10 Tables S1 to S9

11 References for SI reference citations

## 12 **Supplementary Methods**

13 **Plant strains and growth conditions.** Tomato (*Solanum lycopersicum*) cultivars M82 were raised from seeds in compost  
14 (Levington™ M3) and maintained in a growth room with 16/8h light/dark periods at 22°C (day) and 18°C (night), with 60%  
15 relative humidity, at a light intensity of 300 μmol photons m<sup>-2</sup> · s<sup>-1</sup>. Agrobacterium tumefaciens-mediated stable transformation  
16 of tomato plants were performed based on published work (1).

17 **Cloning and vector construction.** The STTMs vector construction was done based on a previous report (2). In brief, a long  
18 (110bp) DNA oligo containing two mimic sequences separated by a spacer was designed and cloned into a pENTR L1L2  
19 vector (Invitrogen). The insert in this plasmid (pENTR-STTM) was then LR recombined into pGWB402 destination vector  
20 containing a 2X35S promoter driving the expression of the insert, and kanamycin-resistant marker (*NOS promoter:NPTII:NOS*  
21 *terminator*) for selection. All constructs were confirmed by Sanger sequencing.

22 **Small RNA northern blot.** Small RNA detection was performed using the northern blot technique. In brief, 5 μg of total RNA  
23 per sample were prepared in 10 μl, added equal volume of 2X loading buffer (95% deionized formamide, 18 mM EDTA, 0.025%  
24 SDS, xylene cyanol FF, bromophenol blue), and heated at 65°C for 5 min. Then placed in ice for 1 min and loaded and run in  
25 a 15% polyacrylamide 7 M urea gel, using 0.5X TBE running buffer. RNA was then transferred to a positively charged nylon  
26 membrane (Amersham Hybond-N+, GE Healthcare™) using overnight capillary system: gels were soaked for 10 min in 20X  
27 SSC, then placed on a clean glass plate, membrane on top, 2 pieces of 3MM paper soaked in 20X SSC, and finally 3-5cm of  
28 thick paper on top. Another glass plate was put on top and 1kg of weight over this plate. RNA was cross-linked two times per  
29 side with 0.12 J of UV light in a Stratalinker® (Agilent™). Oligonucleotides and Locked Nucleic Acid (LNA™; by Exiqon)  
30 probes radiolabelled with γ<sup>32</sup>P-ATP were hybridized in ULTRAhyb-Oligo buffer (Thermo Fisher Scientific™) for 12 hours at  
31 40°C or 2 hours at 57°C, respectively. Then washed three times with 2X SSC, 0.2% SDS. Phosphorimager plates (Fujifilm) were  
32 exposed and then imaged with a Typhoon 8610 (Molecular Dynamics).

33 **Target prediction.** All tomato miRNA mature sequences were downloaded from miRBase (v21) (3). MicroRNAs targeting genes  
34 were predicted by psRNATarget v1 (Dai and Zhao, 2011). Cut-off values were established based on the optimal scores reported  
35 in previous studies (4). Tomato NLR sequences were retrieved from a previous study (5) and curated using the ITAG3.2  
36 annotation.

37 **Degradome (PARE) analysis.** Parallel analysis of RNA ends (PARE) was performed using the software sPARTA (6). The  
38 analysis was done on publicly available datasets from the tomato degradome data of leaf samples (7).

39 **sRNAseq analysis.** Small RNAs libraries were prepared using the NEBNext® Small RNA Library Prep (New England Biolabs).  
40 In brief, three biological replicates each of 1 month old tomato leaf RNA were prepared using 1 μg of total RNA per sample.  
41 After preparation, size selection of libraries was performed using BluePippin 3% agarose cassettes (Sage Science). Each  
42 library was barcoded, pooled, and sequenced using a single NextSeq 500/550 High Output Kit v2 (75 cycles). Sequences were  
43 demultiplex, and trimmed and filtered using Trim Galore! (Babraham Bioinformatics) with default parameters and reads  
44 were concordantly aligned to the Heinz genome SL3.00 version using Bowtie v1.2.0 with modifiers -v 1 -m 50 -best -strata.  
45 Identification of sRNA loci and differential expression was performed using the segmentSeq package and baySeq respectively  
46 (8, 9).

47 **Phytophthora infestans infections.** The *Phytophthora infestans* strain in this study is 88069 (10). Cultures were stored in liquid  
48 nitrogen and grown on rye sucrose medium. Infection assays were performed on detached tomato leaves, measuring lesion sizes.  
49 In brief, four well developed leaves per plant and four plants per condition were detached from four-week-old plants and placed  
50 on water-saturated paper in a tray. Spore suspensions of *P. infestans* were prepared by rinsing two-week-old plates covered with  
51 mycelium with cold water and incubating the sporangiophore at 4°C for 1-2 hours. After release of zoospores, the concentration  
52 was adjusted to approximately 5 · 10<sup>4</sup> spores · ml<sup>-1</sup>. *P. infestans* were spot-inoculated on the abaxial side of the leaf, by  
53 placing six 10 μl droplets on various locations right and left of the midvein. The trays were covered and incubated at room  
54 temperature at constant light a photoperiod. Disease assessments were performed daily from 3 to 7 days post inoculation (dpi)  
55 under blue light using a DarkReader® Transilluminator (Clare Chemical Research) and a Nikon COOLPIX P520. Lesion  
56 diameters were measured using ImageJ software, followed by statistical analysis and plotting in R.

57 **Pseudomonas syringae infections.** The *Pseudomonas syringae* pv. *tomato* strain used in this study is DC3000, which is a  
58 pathogen of tomato developed in 1986 as rifampicin-resistant derivative of Pst DC52. Cultures were stored in liquid nitrogen  
59 and grown on King's B medium. Infection assays were performed in planta, inoculating mature tomato leaves and measuring  
60 bacterial growth based on previous work (11). Statistical analysis and plotting were done in R.

61 **RNAseq analysis.** RNAseq libraries were prepared using the Truseq® mRNA HT kit (Illumina). In brief, total RNA from three  
62 different conditions (young: 3 weeks old leaves, old: 6 weeks old leaves, and infected: 3 day post inoculation of detached leaves  
63 with *P. infestans*) with six biological replicates each of 3 week old, and 6 week old tomato leaves, RNA were prepared using 1  
64 μg of total RNA per sample. PolyA bead selection and strand-specific RNA-seq libraries were made and indexed according to  
65 manufacturer instructions. Finalized libraries were sequenced as a pool on one lane of a NextSeq 500/550 High Output Kit v2

66 (75+75 cycles). Sequences were de-multiplex, and trimmed and filtered using Trim Galore! (Babraham Bioinformatics) with  
67 default parameters. Trimmed reads were pseudo-aligned to ITAG3.2 transcriptome using Kallisto (12), with the parameter -b  
68 100. Differential expression was performed on kallisto-estimated counts using the Bioconductor package limma (13). For visual  
69 representations and analysis, abundances were reported as quantile-normalized transcripts per million (TPM). Processing,  
70 analysis and plotting were done in R.

71 **Phylogenetic analysis.** BLASTN analyses were performed using genomic sequences of tomato genes and miRNA precursor  
72 sequences against the genomes of all plant model organisms and all available genome assemblies of major Solanaceae species.  
73 The threshold expectation value was defined at  $10^{-3}$  to filter out any spurious hits. Any hits were then manually curated.

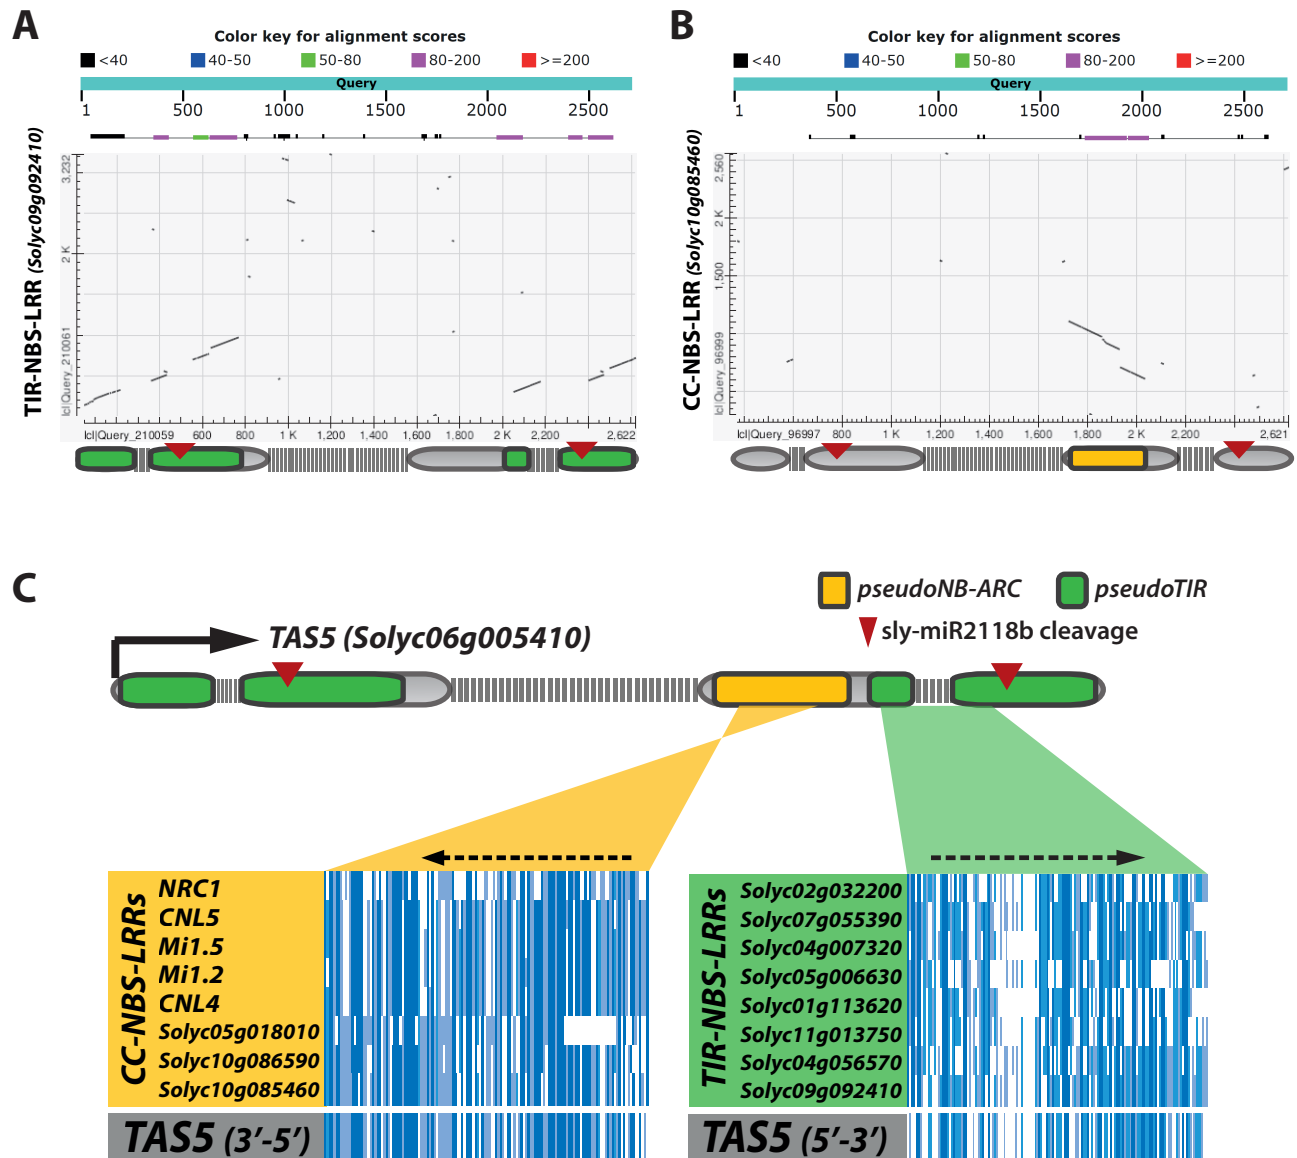

**Fig. S1.** Sequence similarity between NLR domains and TAS5. BLAST (Basic Local Alignment Search Tool) summary and dot plot matrix of TAS5 versus (A) the closest TNL and (B) the closest CNL in the tomato genome. Gene diagram of TAS5 locus is placed underneath the matrix indicates in (A) similarity to a TIR domain in green and (B) similarity to a NB-ARC in yellow. (C) Regions within exons with most significant sequence similarity with known NLR domains are highlighted in yellow and green. Nucleotide sequence alignment of these regions and known tomato NLRs are shown below. The degree of conservation for each nucleotide along the region is represented by the colour, with a dark blue denoting a high level of conservation and a light blue denoting a low level. Dotted arrows indicate direction of the sequence similarity.

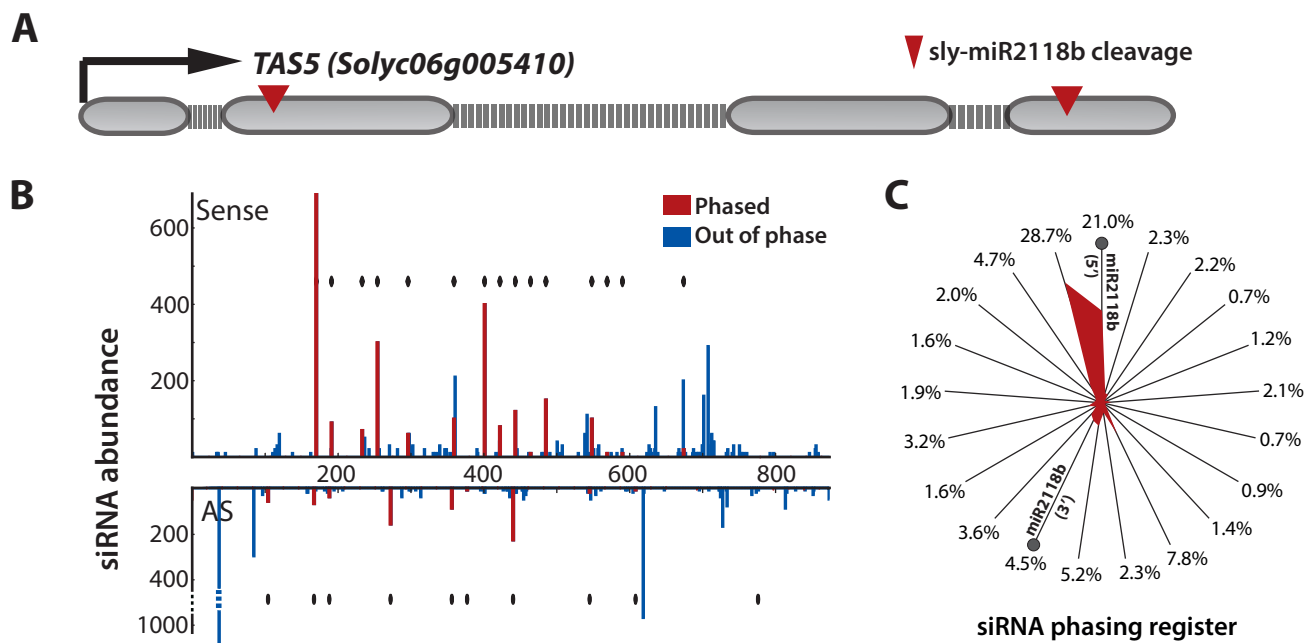

**Fig. S2.** TAS5 is a phasiRNA-producing locus. (A) Gene diagram of TAS5 locus. A 2.7kb region containing 4 exons (grey boxes) and 3 introns (grey dotted lines). The arrow on the left indicates transcription start site and direction. (B) Number of sequenced small RNAs with 5' residues at each position between the cleavage sites of the TAS5 transcript. Red bars indicate phased sequences while blue indicate out of phase. Red diamonds indicate that expected phased siRNA is present in the sample. (C) Distribution of the phasing of small RNAs at the TAS5 locus. Each spoke of wheel the represents 1 of the 21 possible registers, with the percentage of small RNAs mapping plotted as distance from the centre (correction of 2-nt 3' overhangs of DCL cleavage was applied when assigning register in the anti-sense strand). The specific registers predicted from 5' and 3' cleavage sites of miR2118b are indicated with grey circles.

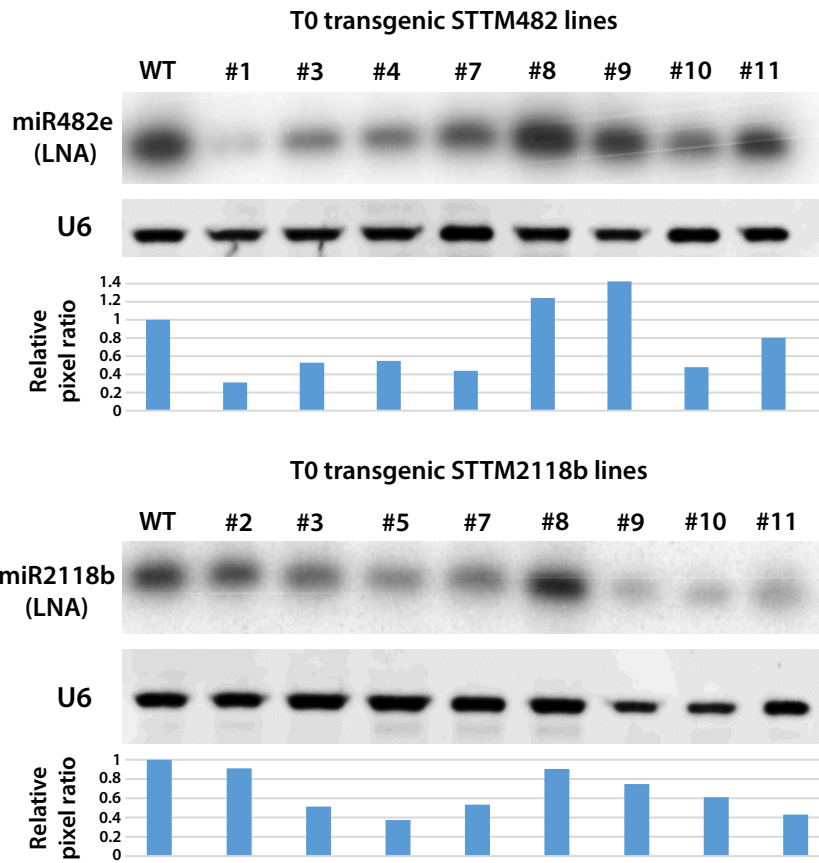

**Fig. S3.** Levels of target miRNA sequestration in first generation STTM transgenic lines. RNA gel blot analysis of tomato transgenic mimic lines. Upper line shows miRNA blotted with highly specific locked nucleic acid (LNA) probes. Lower image shows the same blot hybridized with U6, as a loading control. Barplot indicates relative pixel ratio of miRNA signal vs U6 signal.

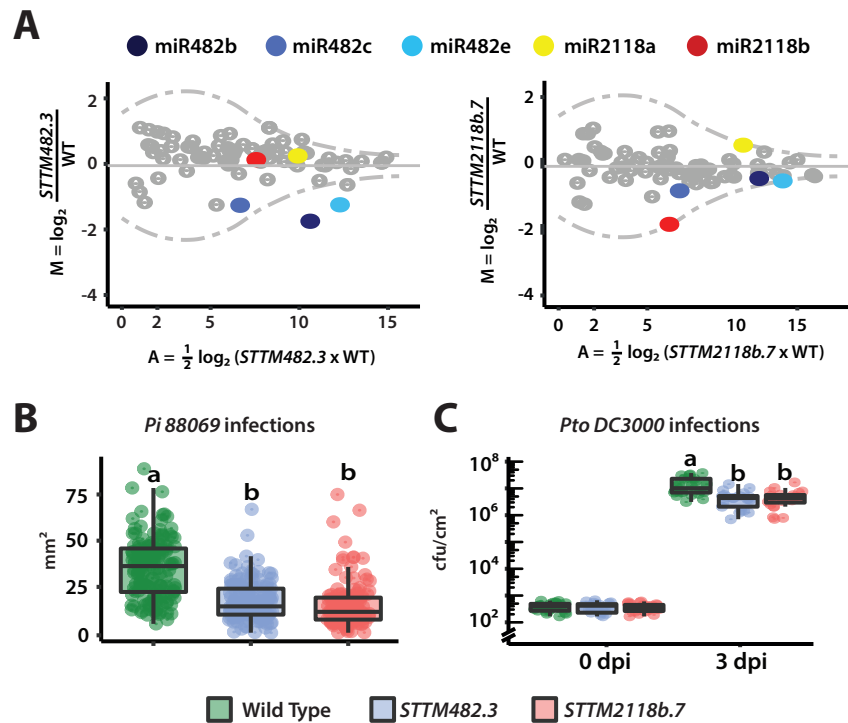

**Fig. S4.** Effects were consistent across independent STTM lines. (A) MA plot showing fold changes of miRNAs in STTM lines. Tomato mature miRNA sequences were extracted from miRBASE. The blue dots indicate miR482, yellow is miR2118a and red is miR2118b; grey indicate other miRNAs. The dotted line represents a Poisson distribution with 1 % significance values at the top and bottom of the range, applying the 0 correction (if nreads=0;+1). sRNA reads are normalized to the whole library with reads per million (nRPM) and presented as the mean from three biological replicates. (B) Boxplot and leaf images of lesion size in WT and mimicry lines. Statistically significant differences were determined using one-way ANOVA test followed by Tukey HSD at 95% confidence limits. (C) Boxplot of bacterial population in WT and STTM lines leaves infected with *Pseudomonas syringae* pv. *tomato DC3000*. Bacterial counts at 0 and 3 days post leaf infiltration. Statistically significant differences were determined using ANOVA test followed by Tukey HSD at 95% confidence limits.

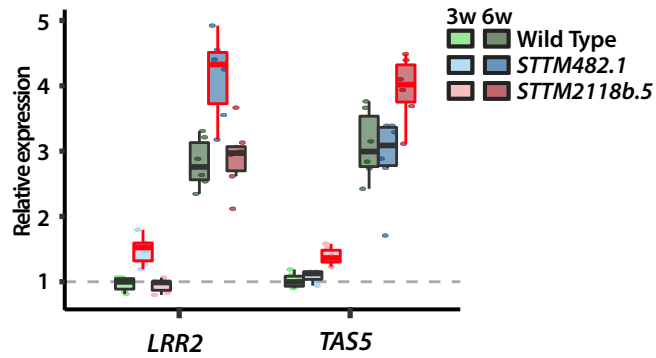

**Fig. S5.** qRT-PCR analysis validates RNA-seq results for miR482 and miR2118b targets. Quantitative PCR analysis for the abundance of target mRNAs *LRR2* and *TAS5* in 3 and 6 week old leaf tissue (n=6). Expression values were adjusted to tomato housekeeping gene EXP and shown relatively to WT values. Statistically significant differences were explored using two-way ANOVA test followed by Tukey HSD at 95% confidence limits.



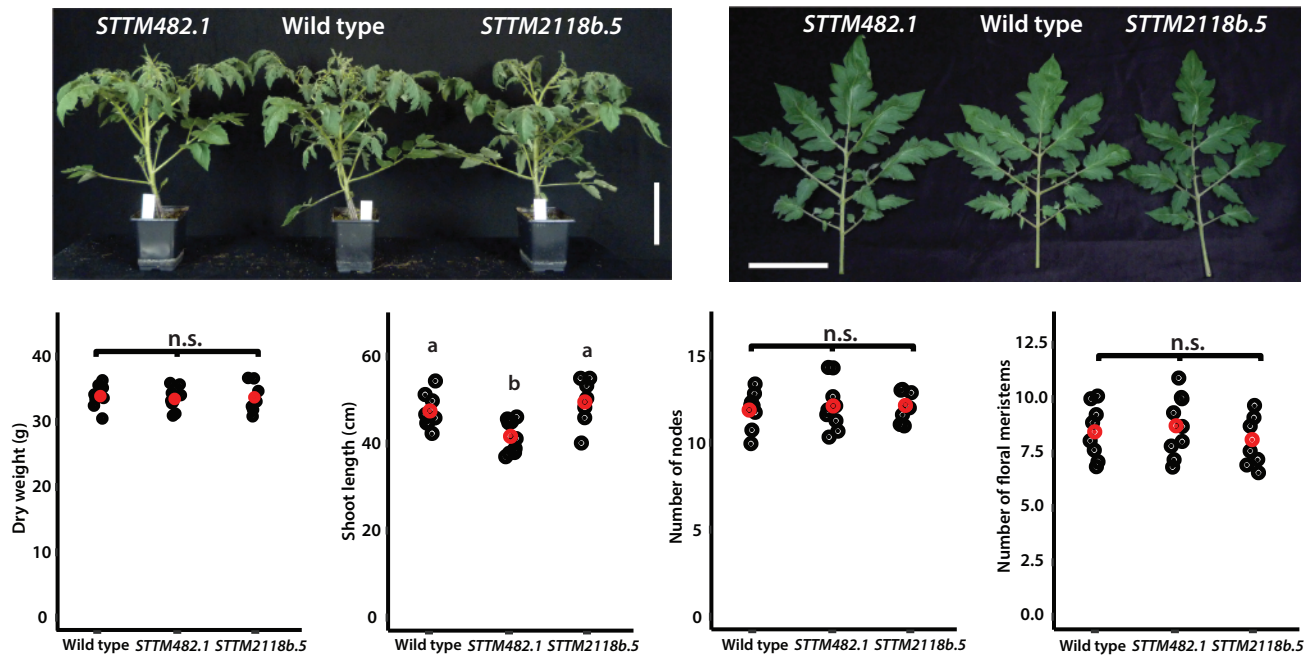

**Fig. S6.** Growth remains majorly unaffected in STTM transgenic lines. (Top) representative images of leaves and whole plants. White scale bars represent 10cm. (Bottom) Dot plots representing differences in shoot dry weight, length, number of nodes, and number of floral meristems. Black dots represent individual plants, and red dots represent means of all biological replicates (n=8). Images and data were collected at 8 week after germination. Statistically significant differences were determined using a two-way ANOVA test followed by Tukey HSD at 95% confidence limits.

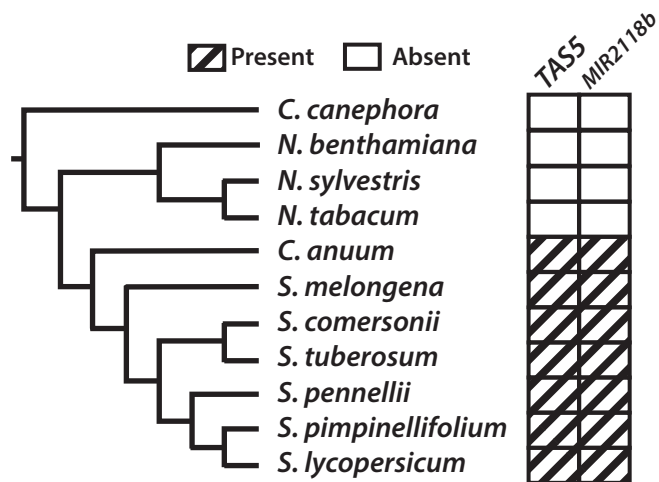

**Fig. S7.** TAS5 and MIR2118b are only present in *Solanum* species. Diagram summarising the presence or absence of genomic sequences matching TAS5 and MIR2118b in Solanaceae and a close relative. A close sequenced relative of Solanaceae, *Coffea canephora*, was included as an outgroup.

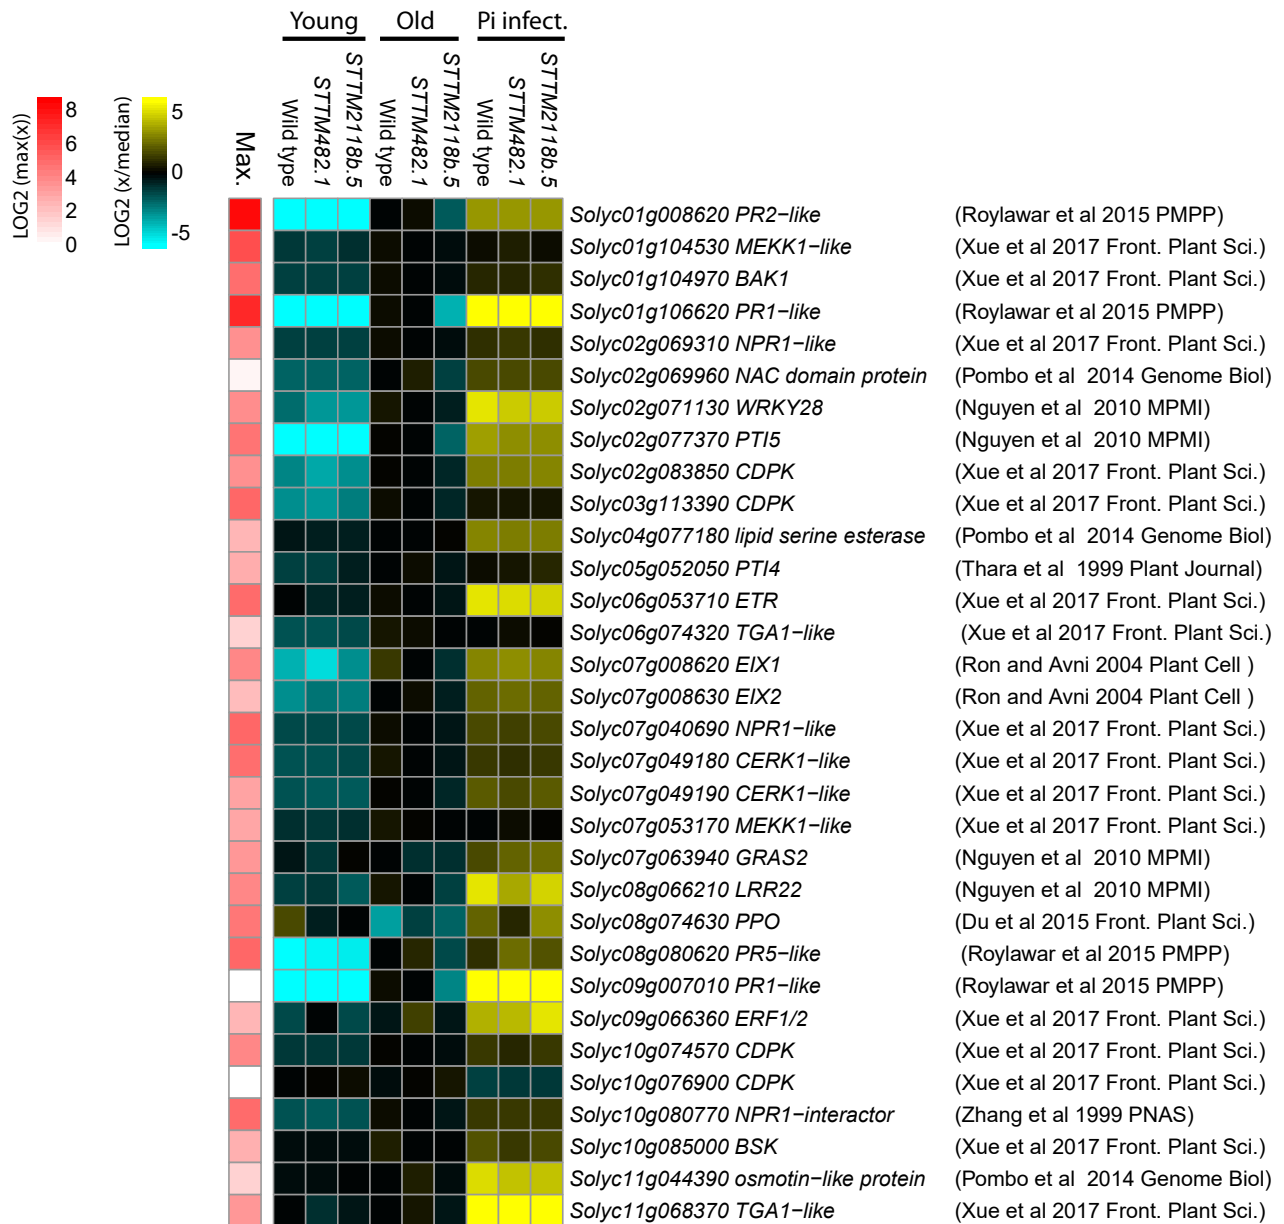

**Fig. S8.** Known non-NLR defense-related genes remain unaffected in STTM lines. Heatmap of the RNAseq for the non-NLR PTI/ETI-related genes. RNAseq abundances are presented in transcript per million (TPM) and Log2 fold changes between STTM lines and WT across conditions. The list was elaborated based on published work in tomato (14–21).

**Table S1. Summary of identified members of the miR482/2118 family in tomato. All available nomenclatures of miR482/2118 members in tomato in the different studies, present in the current literature.**

| Sequence               | This work | miRBase     | Zhang et al. 2016 (22) | DeVries et al. 2015 (23) | Shivaprasaet et al. 2012 (24) | Karlova et al. 2013 (25) | Notes                       |
|------------------------|-----------|-------------|------------------------|--------------------------|-------------------------------|--------------------------|-----------------------------|
| UUUCCAAUUCACCCAUUCCUA  | mi2118a   | sly miR482a | miR482a                | miR482                   | miR482                        | miR-Y                    | -                           |
| UUUCCUUAUUCACCCAUUGCAA | mi2118b   | sly-miR482d | miR482d                | miR482g                  | -                             | -                        | -                           |
| UCUUGCCUACACCGCCCAUGCC | miR482b   | sly-miR482b | miR482b                | miR482a                  | miR482a                       | -                        | -                           |
| UCUUUCCUACUCCUCCCAUACC | miR482e   | sly-miR482e | miR482e                | miR482f                  | miR482f                       | miR482*                  | -                           |
| UCUUGCCAAUACCGCCCAUUC  | miR482c   | sly-miR482c | miR482c                | miR482b                  | miR482b                       | -                        | -                           |
| UUACCAAUUCACCCAUUCCUA  | -         | -           | -                      | miR482h                  | -                             | -                        | No evidence of expression   |
| UCUUUCCUACUCCUCCCUACC  | -         | -           | -                      | -                        | miR482c                       | -                        | No evidence of expression   |
| UCUUUCCUACUCCUCCCAUGCC | -         | -           | -                      | -                        | miR482e                       | -                        | or presence of the sequence |
| UCUUUCCUACUCCUCCCAUCC  | -         | -           | -                      | -                        | miR482d                       | -                        | in the genome               |

**Table S2. Summary of all predicted targets of miR482/2118 members.**

| miRNA   | Target         | Score | UPE    | Posit | Target description                                          |
|---------|----------------|-------|--------|-------|-------------------------------------------------------------|
| mi2118a | Solyc11g008140 | 1     | 11.101 | 1224  | Pectate lyase                                               |
| mi2118a | Solyc01g102920 | 2     | 14.713 | 635   | Disease resistance protein (TIR-NBS-LRR class)              |
| mi2118a | Solyc04g007320 | 2     | 21.199 | 1110  | Disease resistance protein (TIR-NBS-LRR class)              |
| mi2118a | Solyc01g020371 | 2.5   | 20.058 | 349   | GRF zinc finger family protein                              |
| mi2118a | Solyc03g116360 | 2.5   | 15.966 | 2405  | Regulator of chromosome condensation (RCC1) family protein  |
| mi2118a | Solyc04g024950 | 2.5   | 15.862 | 4     | MATH domain/coiled-coil protein                             |
| mi2118a | Solyc04g049780 | 2.5   | 13.961 | 70    | Retrovirus-related Pol polyprotein from transposon TNT 1-94 |
| mi2118a | Solyc04g053070 | 2.5   | 17.989 | 278   | DNA topoisomerase                                           |
| mi2118a | Solyc06g009533 | 2.5   | 18.082 | 77    | Kinase family protein                                       |
| mi2118a | Solyc06g062440 | 2.5   | 22.729 | 593   | Disease resistance protein                                  |
| mi2118a | Solyc10g007065 | 2.5   | 17.785 | 580   | Phenylalanyl-tRNA synthetase alpha chain                    |
| mi2118a | Solyc01g066020 | 3     | 25.484 | 656   | disease resistance protein (TIR-NBS-LRR class)              |
| mi2118a | Solyc01g087200 | 3     | 19.95  | 515   | Disease resistance protein                                  |
| mi2118a | Solyc01g090860 | 3     | 8.404  | 782   | Nucleotidyltransferase family protein                       |
| mi2118a | Solyc02g030100 | 3     | 17.13  | 3745  | Vacuolar protein sorting-associated protein 54              |
| mi2118a | Solyc02g030105 | 3     | 17.13  | 2139  | Vacuolar protein sorting-associated protein 54              |
| mi2118a | Solyc02g091890 | 3     | 6.22   | 4704  | myb-like protein X                                          |
| mi2118a | Solyc03g083130 | 3     | 16.198 | 1745  | gamma-irradiation and mitomycin c induced 1                 |
| mi2118a | Solyc05g009750 | 3     | 17.541 | 164   | NBS-LRR resistance protein-like protein                     |
| mi2118a | Solyc08g005510 | 3     | 18.753 | 1512  | disease resistance protein (TIR-NBS-LRR class)              |
| mi2118a | Solyc09g090390 | 3     | 18.271 | 1709  | 2-oxoglutarate-dependent dioxygenase AOP2                   |
| mi2118a | Solyc10g050115 | 3     | 5.699  | 891   | Transposon Ty3-I Gag-Pol polyprotein                        |
| mi2118a | Solyc11g011350 | 3     | 19.87  | 1381  | disease resistance protein (TIR-NBS-LRR class)              |
| mi2118a | Solyc12g009450 | 3     | 19.542 | 727   | Disease resistance protein (CC-NBS-LRR class) family        |
| mi2118a | Solyc12g056490 | 3     | 23.311 | 324   | WD40 repeat-containing protein                              |
| mi2118a | Solyc01g094520 | 3.5   | 20.797 | 978   | F-box/kelch-repeat protein                                  |
| mi2118a | Solyc01g112260 | 3.5   | 30.089 | 316   | Phosphoenolpyruvate carboxylase                             |
| mi2118a | Solyc02g064680 | 3.5   | 19.849 | 1125  | Calcium-transporting ATPase                                 |
| mi2118a | Solyc02g090860 | 3.5   | 19.613 | 1387  | Phenylalanyl-tRNA synthetase alpha chain                    |
| mi2118a | Solyc03g025190 | 3.5   | 21.744 | 803   | anthocyanin permease                                        |
| mi2118a | Solyc03g112630 | 3.5   | 16.495 | 3497  | Sec14p-like phosphatidylinositol transfer family protein    |
| mi2118a | Solyc04g011960 | 3.5   | 15.189 | 521   | Disease resistance protein (CC-NBS-LRR class) family        |
| mi2118a | Solyc04g011980 | 3.5   | 16.151 | 521   | Disease resistance protein (CC-NBS-LRR class) family        |
| mi2118a | Solyc04g011990 | 3.5   | 15.575 | 1077  | Disease resistance protein (NBS-LRR class) family           |
| mi2118a | Solyc04g012000 | 3.5   | 17.228 | 221   | NBS-coding resistance gene analog                           |
| mi2118a | Solyc04g012010 | 3.5   | 18.466 | 541   | Disease resistance protein (NBS-LRR class) family           |
| mi2118a | Solyc05g010240 | 3.5   | 11.485 | 3748  | Chaperonin-60 beta subunit                                  |
| mi2118a | Solyc06g061215 | 3.5   | 20.712 | 170   | Proteinase inhibitor II                                     |
| mi2118a | Solyc06g069390 | 3.5   | 24.527 | 1442  | D-aminoacyl-tRNA deacylase                                  |
| mi2118a | Solyc07g063430 | 3.5   | 13.261 | 643   | Peroxisomal membrane (Mpv17/PMP22) family protein           |
| mi2118a | Solyc08g066500 | 3.5   | 13.834 | 554   | Homeobox leucine-zipper protein                             |
| mi2118a | Solyc09g005290 | 3.5   | 20.812 | 668   | Nbs-llr resistance protein                                  |
| mi2118a | Solyc09g091990 | 3.5   | 18.213 | 665   | Kinase family protein                                       |
| mi2118a | Solyc10g087013 | 3.5   | 18.136 | 838   | Cytochrome P450                                             |
| mi2118a | Solyc12g056960 | 3.5   | 13.791 | 484   | Glucan 1                                                    |
| mi2118a | Solyc01g008800 | 4     | 14.87  | 1561  | disease resistance protein (TIR-NBS-LRR class)              |
| mi2118a | Solyc01g111160 | 4     | 17.893 | 181   | far-red elongated hypocotyls 3                              |
| mi2118a | Solyc02g081870 | 4     | 16.621 | 267   | Pleiotropic drug resistance ABC transporter                 |
| mi2118a | Solyc02g093340 | 4     | 15.426 | 1078  | RNA-binding (RRM/RBD/RNP motifs) family protein             |
| mi2118a | Solyc03g111140 | 4     | 18.294 | 766   | Malate synthase                                             |
| mi2118a | Solyc03g115740 | 4     | 10.662 | 2443  | Xyloglucan alpha-1                                          |
| mi2118a | Solyc05g008340 | 4     | 23.996 | 791   | Core-2/I-branching beta-1                                   |
| mi2118a | Solyc05g009470 | 4     | 14.478 | 2663  | Alpha-glucosidase                                           |
| mi2118a | Solyc06g009533 | 4     | 20.01  | 1085  | Kinase family protein                                       |
| mi2118a | Solyc06g065820 | 4     | 14.049 | 582   | Ethylene Response Factor H.1                                |
| mi2118a | Solyc06g068700 | 4     | 21.249 | 2627  | Calreticulin/calnexin                                       |
| mi2118a | Solyc07g008950 | 4     | 20.753 | 2523  | Methionyl-tRNA synthetase family protein                    |
| mi2118a | Solyc07g008955 | 4     | 20.753 | 2631  | Unknown protein                                             |

|         |                |     |        |      |                                                            |
|---------|----------------|-----|--------|------|------------------------------------------------------------|
| mi2118a | Solyc07g041030 | 4   | 22.468 | 277  | DNA topoisomerase                                          |
| mi2118a | Solyc08g013900 | 4   | 19.494 | 4686 | Plant regulator RWP-RK family protein                      |
| mi2118a | Solyc08g082000 | 4   | 17.749 | 789  | Homeobox-leucine zipper HOX24                              |
| mi2118a | Solyc09g007710 | 4   | 26.176 | 986  | Disease resistance protein (TIR-NBS-LRR class) family      |
| mi2118a | Solyc09g075010 | 4   | 4.321  | 683  | HSP20-like chaperones superfamily protein                  |
| mi2118a | Solyc11g045350 | 4   | 19.839 | 3532 | Plant regulator RWP-RK family protein                      |
| mi2118a | Solyc11g062220 | 4   | 19.961 | 5265 | Zinc finger CCCH domain-containing protein 44              |
| mi2118b | Solyc06g005410 | 1   | 15.878 | 592  | TAS5                                                       |
| mi2118b | Solyc06g005410 | 1   | 15.569 | 1639 | TAS5                                                       |
| mi2118b | Solyc02g032650 | 2   | 15.284 | 796  | Disease resistance protein (TIR-NBS-LRR class)             |
| mi2118b | Solyc01g105340 | 2.5 | 20.142 | 810  | Chaperone protein DnaJ                                     |
| mi2118b | Solyc01g113620 | 2.5 | 16.895 | 806  | Disease resistance protein (TIR-NBS-LRR class) family      |
| mi2118b | Solyc04g009110 | 2.5 | 18.119 | 572  | Nbs-lrr resistance protein                                 |
| mi2118b | Solyc04g009130 | 2.5 | 20.332 | 584  | Nbs-lrr resistance protein                                 |
| mi2118b | Solyc04g009290 | 2.5 | 18.898 | 572  | Disease resistance protein                                 |
| mi2118b | Solyc04g026110 | 2.5 | 22.415 | 491  | Disease resistance family protein                          |
| mi2118b | Solyc05g009750 | 2.5 | 17.541 | 164  | NBS-LRR resistance protein-like protein                    |
| mi2118b | Solyc08g075630 | 2.5 | 26.52  | 743  | NBS-LRR resistance protein                                 |
| mi2118b | Solyc08g076000 | 2.5 | 25.842 | 851  | NBS-LRR resistance protein                                 |
| mi2118b | Solyc01g102920 | 3   | 14.713 | 635  | Disease resistance protein (TIR-NBS-LRR class)             |
| mi2118b | Solyc02g030290 | 3   | 19.46  | 281  | Nbs-lrr resistance protein                                 |
| mi2118b | Solyc02g037540 | 3   | 23.811 | 479  | Disease resistance protein                                 |
| mi2118b | Solyc06g062440 | 3   | 22.729 | 592  | Disease resistance protein                                 |
| mi2118b | Solyc08g075640 | 3   | 24.051 | 836  | NBS-LRR resistance protein                                 |
| mi2118b | Solyc09g075010 | 3   | 16.92  | 611  | HSP20-like chaperones superfamily protein                  |
| mi2118b | Solyc09g098100 | 3   | 18.265 | 2059 | CC-NBS-LRR_Solyc09g098100                                  |
| mi2118b | Solyc01g110000 | 3.5 | 16.414 | 2336 | Beta-galactosidase                                         |
| mi2118b | Solyc02g036270 | 3.5 | 16.852 | 679  | Disease resistance protein (NBS-LRR class) family          |
| mi2118b | Solyc03g123630 | 3.5 | 23.333 | 1670 | pectin methylesterase                                      |
| mi2118b | Solyc04g009120 | 3.5 | 22.379 | 599  | Nbs-lrr resistance protein                                 |
| mi2118b | Solyc04g025820 | 3.5 | 20.87  | 312  | Disease resistance protein                                 |
| mi2118b | Solyc04g025840 | 3.5 | 20.843 | 491  | Disease resistance family protein                          |
| mi2118b | Solyc05g008070 | 3.5 | 21.429 | 530  | Disease resistance protein                                 |
| mi2118b | Solyc05g014030 | 3.5 | 21.401 | 738  | Regulator of chromosome condensation (RCC1) family protein |
| mi2118b | Solyc06g007780 | 3.5 | 21.021 | 2776 | Nuclear transport factor 2 (NTF2)                          |
| mi2118b | Solyc07g039400 | 3.5 | 22.502 | 491  | Disease resistance protein                                 |
| mi2118b | Solyc07g039420 | 3.5 | 22.458 | 566  | Disease resistance protein (NBS-LRR class) family          |
| mi2118b | Solyc08g067060 | 3.5 | 24.14  | 674  | Pentatricopeptide repeat superfamily protein               |
| mi2118b | Solyc08g074250 | 3.5 | 15.378 | 545  | Disease resistance protein (CC-NBS-LRR class) family       |
| mi2118b | Solyc11g008140 | 3.5 | 11.101 | 1224 | Pectate lyase                                              |
| mi2118b | Solyc12g006040 | 3.5 | 21.275 | 662  | NBS-LRR protein                                            |
| mi2118b | Solyc01g105775 | 4   | 23.141 | 221  | Carbonic anhydrase                                         |
| mi2118b | Solyc01g111100 | 4   | 18.433 | 635  | Neutral invertase                                          |
| mi2118b | Solyc02g079310 | 4   | 16.167 | 387  | Equilibrative nucleoside transporter family protein        |
| mi2118b | Solyc02g079350 | 4   | 14.312 | 2490 | Equilibrative nucleoside transporter family protein        |
| mi2118b | Solyc02g083960 | 4   | 19.892 | 3334 | 2-oxoglutarate and Fe-dependent oxygenase-like protein     |
| mi2118b | Solyc03g007330 | 4   | 22.962 | 983  | ATP-dependent zinc metalloprotease FTSH protein            |
| mi2118b | Solyc03g083430 | 4   | 21.732 | 1551 | Splicing factor 3A subunit 3                               |
| mi2118b | Solyc04g005540 | 4   | 17.383 | 850  | Disease resistance protein (NBS-LRR class) family          |
| mi2118b | Solyc04g005550 | 4   | 21.364 | 868  | Disease resistance protein (NBS-LRR class) family          |
| mi2118b | Solyc04g071260 | 4   | 21.507 | 2316 | Actin                                                      |
| mi2118b | Solyc05g014760 | 4   | 21.583 | 3126 | Kinase family protein                                      |
| mi2118b | Solyc05g018720 | 4   | 17.342 | 62   | NBS-coding resistance protein                              |
| mi2118b | Solyc07g005770 | 4   | 24.094 | 539  | Disease resistance protein                                 |
| mi2118b | Solyc07g064700 | 4   | 25.463 | 1362 | Bromodomain-containing protein                             |
| mi2118b | Solyc09g005120 | 4   | 18.535 | 483  | DnaJ domain-containing protein                             |
| mi2118b | Solyc09g076010 | 4   | 8.678  | 370  | Acyl-CoA N-acyltransferase                                 |
| mi2118b | Solyc10g008230 | 4   | 19.11  | 548  | Disease resistance protein                                 |
| mi2118b | Solyc11g069020 | 4   | 20.947 | 497  | Disease resistance protein                                 |
| mi2118b | Solyc12g017800 | 4   | 23.624 | 1102 | NBS-LRR class disease resistance protein                   |
| mi2118b | Solyc12g099060 | 4   | 23.521 | 644  | Disease resistance protein                                 |

|         |                |     |        |      |                                                              |
|---------|----------------|-----|--------|------|--------------------------------------------------------------|
| mi2118b | Solyc12g099940 | 4   | 15.941 | 2435 | Acyl-CoA N-acyltransferase                                   |
| miR482b | Solyc04g009070 | 0   | 25.758 | 211  | Disease resistance family protein                            |
| miR482b | Solyc02g036270 | 1.5 | 12.267 | 681  | Disease resistance protein (NBS-LRR class) family            |
| miR482b | Solyc04g009120 | 1.5 | 21.183 | 601  | Nbs- <i>lrr</i> resistance protein                           |
| miR482b | Solyc05g008070 | 1.5 | 21.303 | 532  | Disease resistance protein                                   |
| miR482b | Solyc04g025820 | 2   | 19.14  | 314  | Disease resistance protein                                   |
| miR482b | Solyc04g025840 | 2   | 19.226 | 493  | Disease resistance family protein                            |
| miR482b | Solyc07g039420 | 2   | 23.494 | 568  | Disease resistance protein (NBS-LRR class) family            |
| miR482b | Solyc11g065780 | 2   | 21.191 | 786  | Disease resistance protein                                   |
| miR482b | Solyc12g017800 | 2   | 24.453 | 1104 | NBS-LRR class disease resistance protein                     |
| miR482b | Solyc01g067165 | 2.5 | 20.018 | 529  | Disease resistance protein (CC-NBS-LRR class) family protein |
| miR482b | Solyc04g009130 | 2.5 | 20.794 | 586  | Nbs- <i>lrr</i> resistance protein                           |
| miR482b | Solyc04g009290 | 2.5 | 23.41  | 574  | Disease resistance protein                                   |
| miR482b | Solyc07g039400 | 2.5 | 22.497 | 493  | Disease resistance protein                                   |
| miR482b | Solyc10g054970 | 2.5 | 19.563 | 538  | CCNBS gene                                                   |
| miR482b | Solyc10g054990 | 2.5 | 16.38  | 520  | Disease resistance protein (NBS-LRR class) family            |
| miR482b | Solyc10g055170 | 2.5 | 21.742 | 46   | Disease resistance protein (CC-NBS-LRR class) family protein |
| miR482b | Solyc11g006530 | 2.5 | 18.804 | 526  | Disease resistance protein                                   |
| miR482b | Solyc11g006630 | 2.5 | 21.57  | 532  | Disease resistance protein                                   |
| miR482b | Solyc04g009240 | 3   | 27.611 | 565  | Nbs- <i>lrr</i> resistance protein                           |
| miR482b | Solyc04g009250 | 3   | 28.375 | 577  | Nbs- <i>lrr</i> resistance protein                           |
| miR482b | Solyc04g009660 | 3   | 28.833 | 550  | Nbs- <i>lrr</i> resistance protein                           |
| miR482b | Solyc04g009690 | 3   | 27.03  | 562  | Nbs- <i>lrr</i> resistance protein                           |
| miR482b | Solyc07g005770 | 3   | 23.779 | 541  | Disease resistance protein                                   |
| miR482b | Solyc08g005440 | 3   | 21.814 | 627  | NBS-LRR disease resistance protein                           |
| miR482b | Solyc10g051050 | 3   | 21.243 | 929  | Disease resistance protein                                   |
| miR482b | Solyc11g020090 | 3   | 20.197 | 103  | Disease resistance protein                                   |
| miR482b | Solyc11g020100 | 3   | 23.736 | 1110 | Disease resistance protein                                   |
| miR482b | Solyc11g069925 | 3   | 24.835 | 622  | Disease resistance protein                                   |
| miR482b | Solyc01g113620 | 3.5 | 16.593 | 808  | Disease resistance protein (TIR-NBS-LRR class) family        |
| miR482b | Solyc02g032650 | 3.5 | 15.288 | 798  | Disease resistance protein (TIR-NBS-LRR class)               |
| miR482b | Solyc02g070730 | 3.5 | 25.498 | 412  | NBS-LRR resistance protein                                   |
| miR482b | Solyc04g005540 | 3.5 | 15.547 | 852  | Disease resistance protein (NBS-LRR class) family            |
| miR482b | Solyc04g005550 | 3.5 | 18.848 | 870  | Disease resistance protein (NBS-LRR class) family            |
| miR482b | Solyc04g009110 | 3.5 | 17.68  | 574  | Nbs- <i>lrr</i> resistance protein                           |
| miR482b | Solyc04g056746 | 3.5 | 16.29  | 687  | Pentatricopeptide repeat-containing protein                  |
| miR482b | Solyc05g006630 | 3.5 | 29.979 | 1034 | disease resistance protein (TIR-NBS-LRR class)               |
| miR482b | Solyc05g007170 | 3.5 | 22.989 | 5882 | Disease resistance protein                                   |
| miR482b | Solyc06g072000 | 3.5 | 20.074 | 307  | P-loop containing nucleoside triphosphate hydrolases protein |
| miR482b | Solyc07g044790 | 3.5 | 21.329 | 1223 | Pvr4                                                         |
| miR482b | Solyc07g044797 | 3.5 | 21.329 | 286  | CC-NBS-LRR disease resistance protein                        |
| miR482b | Solyc07g049700 | 3.5 | 24.47  | 544  | Disease resistance protein                                   |
| miR482b | Solyc09g065560 | 3.5 | 14.452 | 1794 | Sulfate transporter                                          |
| miR482b | Solyc11g006520 | 3.5 | 23.607 | 819  | Disease resistance protein                                   |
| miR482b | Solyc11g006640 | 3.5 | 26.45  | 532  | Disease resistance protein                                   |
| miR482b | Solyc11g068360 | 3.5 | 22.83  | 622  | Disease resistance protein                                   |
| miR482b | Solyc11g069620 | 3.5 | 21.64  | 706  | Disease resistance protein                                   |
| miR482b | Solyc12g044180 | 3.5 | 19.352 | 526  | CC-NBS-LRR disease resistance protein                        |
| miR482b | Solyc12g044190 | 3.5 | 18.858 | 526  | Disease resistance protein (CC-NBS-LRR class) family protein |
| miR482b | Solyc12g044200 | 3.5 | 18.45  | 1186 | Disease resistance protein (CC-NBS-LRR class) family protein |
| miR482b | Solyc02g037540 | 4   | 23.271 | 481  | Disease resistance protein                                   |
| miR482b | Solyc03g078300 | 4   | 20.201 | 726  | Disease resistance protein                                   |
| miR482b | Solyc04g009150 | 4   | 25.145 | 565  | Nbs- <i>lrr</i> resistance protein                           |
| miR482b | Solyc04g026110 | 4   | 21.107 | 493  | Disease resistance family protein                            |
| miR482b | Solyc04g048920 | 4   | 15.927 | 46   | CC-NBS-LRR disease resistance protein                        |
| miR482b | Solyc05g012740 | 4   | 20.929 | 1585 | Disease resistance protein                                   |
| miR482b | Solyc07g053010 | 4   | 28.026 | 1171 | NBS-LRR type disease resistance protein                      |
| miR482b | Solyc10g045050 | 4   | 14.193 | 268  | Enolase                                                      |
| miR482b | Solyc10g051170 | 4   | 20.714 | 673  | Disease resistance protein                                   |
| miR482b | Solyc10g055050 | 4   | 17.252 | 379  | CC-NBS-LRR disease resistance protein                        |
| miR482b | Solyc11g069990 | 4   | 23.911 | 1218 | I2C5                                                         |

|         |                |     |        |      |                                                                   |
|---------|----------------|-----|--------|------|-------------------------------------------------------------------|
| miR482b | Solyc11g070020 | 4   | 23.911 | 1990 | Disease resistance protein                                        |
| miR482b | Solyc11g071423 | 4   | 25.798 | 229  | Disease resistance protein                                        |
| miR482b | Solyc11g071995 | 4   | 26.508 | 622  | Disease resistance protein                                        |
| miR482b | Solyc12g006040 | 4   | 20.75  | 664  | NBS-LRR protein                                                   |
| miR482c | Solyc08g075630 | 1.5 | 24.851 | 745  | NBS-LRR resistance protein                                        |
| miR482c | Solyc08g076000 | 1.5 | 24.722 | 853  | NBS-LRR resistance protein                                        |
| miR482c | Solyc02g021140 | 2.5 | 7.72   | 4    | Superoxide dismutase                                              |
| miR482c | Solyc02g078280 | 3   | 11.484 | 1597 | DNA ligase-like protein                                           |
| miR482c | Solyc05g006630 | 3   | 29.979 | 1034 | disease resistance protein (TIR-NBS-LRR class)                    |
| miR482c | Solyc06g076350 | 3   | 15.598 | 392  | LePCL1                                                            |
| miR482c | Solyc11g011560 | 3   | 19.304 | 1085 | PHD finger protein family                                         |
| miR482c | Solyc11g065780 | 3   | 21.191 | 786  | Disease resistance protein                                        |
| miR482c | Solyc00g006530 | 3.5 | 25.591 | 771  | Calmodulin-binding protein                                        |
| miR482c | Solyc01g102660 | 3.5 | 18.543 | 218  | Glutathione S-transferase                                         |
| miR482c | Solyc02g032650 | 3.5 | 15.288 | 798  | Disease resistance protein (TIR-NBS-LRR class)                    |
| miR482c | Solyc02g036270 | 3.5 | 12.267 | 681  | Disease resistance protein (NBS-LRR class) family                 |
| miR482c | Solyc04g005540 | 3.5 | 15.547 | 852  | Disease resistance protein (NBS-LRR class) family                 |
| miR482c | Solyc04g005550 | 3.5 | 18.848 | 870  | Disease resistance protein (NBS-LRR class) family                 |
| miR482c | Solyc04g009110 | 3.5 | 17.68  | 574  | Nbs-irr resistance protein                                        |
| miR482c | Solyc04g009150 | 3.5 | 25.145 | 565  | Nbs-irr resistance protein                                        |
| miR482c | Solyc04g025160 | 3.5 | 19.754 | 340  | ATPase                                                            |
| miR482c | Solyc04g026110 | 3.5 | 21.107 | 493  | Disease resistance family protein                                 |
| miR482c | Solyc04g080590 | 3.5 | 25.393 | 748  | Proteasome subunit alpha type                                     |
| miR482c | Solyc06g060360 | 3.5 | 21.646 | 1010 | Adenine nucleotide alpha hydrolases-like superfamily protein      |
| miR482c | Solyc06g083875 | 3.5 | 17.908 | 247  | pollen Ole e I family allergen protein                            |
| miR482c | Solyc07g053200 | 3.5 | 12.314 | 923  | Adenine nucleotide alpha hydrolases-like superfamily protein      |
| miR482c | Solyc08g065740 | 3.5 | 23.005 | 475  | Vacuolar processing enzyme                                        |
| miR482c | Solyc08g068040 | 3.5 | 19.304 | 2071 | zinc finger FYVE domain protein                                   |
| miR482c | Solyc10g007200 | 3.5 | 11.289 | 503  | Hexosyltransferase                                                |
| miR482c | Solyc10g076440 | 3.5 | 18.053 | 475  | Disease resistance protein                                        |
| miR482c | Solyc11g017370 | 3.5 | 19.701 | 1910 | Pentatricopeptide repeat-containing protein                       |
| miR482c | Solyc11g062010 | 3.5 | 20.533 | 9655 | Chromatin structure-remodeling complex subunit snf21              |
| miR482c | Solyc12g005230 | 3.5 | 13.933 | 4336 | Breast carcinoma-amplified sequence 3                             |
| miR482c | Solyc12g019144 | 3.5 | 23.587 | 1538 | RING/U-box superfamily protein                                    |
| miR482c | Solyc01g097390 | 4   | 20.058 | 1141 | NAD(P)-linked oxidoreductase superfamily protein                  |
| miR482c | Solyc01g103450 | 4   | 30.773 | 415  | Heat shock protein 70                                             |
| miR482c | Solyc02g005180 | 4   | 25.396 | 273  | Sugar facilitator protein 2                                       |
| miR482c | Solyc02g070730 | 4   | 25.498 | 412  | NBS-LRR resistance protein                                        |
| miR482c | Solyc02g078790 | 4   | 14.982 | 1601 | Transcription factor jumonji domain protein                       |
| miR482c | Solyc02g080960 | 4   | 18.235 | 39   | transmembrane protein                                             |
| miR482c | Solyc03g097980 | 4   | 17.739 | 550  | Guanine nucleotide-binding alpha-2 subunit                        |
| miR482c | Solyc03g113620 | 4   | 28.565 | 230  | MYB transcription factor                                          |
| miR482c | Solyc05g005460 | 4   | 23.644 | 2043 | Quinone oxidoreductase-like protein                               |
| miR482c | Solyc05g018370 | 4   | 5.408  | 808  | Leguminosin group485 secreted peptide                             |
| miR482c | Solyc06g062440 | 4   | 22.498 | 595  | Disease resistance protein                                        |
| miR482c | Solyc06g068210 | 4   | 6.629  | 2252 | Protein FAR1-RELATED SEQUENCE 8                                   |
| miR482c | Solyc07g052760 | 4   | 16.463 | 540  | DNA-binding storekeeper protein-related transcriptional regulator |
| miR482c | Solyc07g055380 | 4   | 19.526 | 1969 | Disease resistance protein (TIR-NBS-LRR class)                    |
| miR482c | Solyc07g055610 | 4   | 20.758 | 553  | Disease resistance protein (TIR-NBS-LRR class)                    |
| miR482c | Solyc09g007830 | 4   | 14.32  | 265  | Cytokinin riboside 5'-monophosphate phosphoribohydrolase          |
| miR482c | Solyc11g010660 | 4   | 12.438 | 988  | protein SGT1                                                      |
| miR482c | Solyc11g062010 | 4   | 21.236 | 9856 | Chromatin structure-remodeling complex subunit snf21              |
| miR482c | Solyc11g069830 | 4   | 21.579 | 309  | ATPase ASNA1                                                      |
| miR482e | Solyc11g006530 | 1.5 | 18.804 | 526  | Disease resistance protein                                        |
| miR482e | Solyc11g006630 | 1.5 | 21.57  | 532  | Disease resistance protein                                        |
| miR482e | Solyc07g049700 | 2   | 24.47  | 544  | Disease resistance protein                                        |
| miR482e | Solyc01g067165 | 2.5 | 20.018 | 529  | Disease resistance protein (CC-NBS-LRR class) family protein      |
| miR482e | Solyc04g009070 | 2.5 | 25.758 | 211  | Disease resistance family protein                                 |
| miR482e | Solyc05g008070 | 2.5 | 21.303 | 532  | Disease resistance protein                                        |
| miR482e | Solyc06g074760 | 2.5 | 15.026 | 1529 | Ring/U-Box superfamily protein                                    |
| miR482e | Solyc10g054970 | 2.5 | 19.563 | 538  | CCNBS gene                                                        |



|         |                |     |        |      |                                                              |
|---------|----------------|-----|--------|------|--------------------------------------------------------------|
| miR482e | Solyc10g054990 | 2.5 | 16.38  | 520  | Disease resistance protein (NBS-LRR class) family            |
| miR482e | Solyc10g055170 | 2.5 | 21.742 | 46   | Disease resistance protein (CC-NBS-LRR class) family protein |
| miR482e | Solyc11g020100 | 2.5 | 23.736 | 1110 | Disease resistance protein                                   |
| miR482e | Solyc12g009450 | 2.5 | 19.509 | 729  | Disease resistance protein (CC-NBS-LRR class) family         |
| miR482e | Solyc12g017800 | 2.5 | 24.453 | 1104 | NBS-LRR class disease resistance protein                     |
| miR482e | Solyc01g014840 | 3   | 16.059 | 649  | disease resistance protein (TIR-NBS-LRR class)               |
| miR482e | Solyc01g108460 | 3   | 19.975 | 5259 | Carboxypeptidase                                             |
| miR482e | Solyc04g009250 | 3   | 28.375 | 577  | Nbs- <i>lrr</i> resistance protein                           |
| miR482e | Solyc04g009660 | 3   | 28.833 | 550  | Nbs- <i>lrr</i> resistance protein                           |
| miR482e | Solyc04g009690 | 3   | 27.03  | 562  | Nbs- <i>lrr</i> resistance protein                           |
| miR482e | Solyc05g032850 | 3   | 17.25  | 2848 | evolutionarily conserved C-terminal region 2                 |
| miR482e | Solyc07g027020 | 3   | 15.263 | 914  | Protein kinase family protein                                |
| miR482e | Solyc09g091050 | 3   | 15.779 | 833  | Calcium-dependent lipid-binding (CaLB domain) family protein |
| miR482e | Solyc11g006520 | 3   | 23.607 | 819  | Disease resistance protein                                   |
| miR482e | Solyc11g006640 | 3   | 26.45  | 532  | Disease resistance protein                                   |
| miR482e | Solyc11g069925 | 3   | 24.835 | 622  | Disease resistance protein                                   |
| miR482e | Solyc12g006040 | 3   | 20.75  | 664  | NBS-LRR protein                                              |
| miR482e | Solyc01g008800 | 3.5 | 16.457 | 1564 | disease resistance protein (TIR-NBS-LRR class)               |
| miR482e | Solyc01g066020 | 3.5 | 26.023 | 658  | disease resistance protein (TIR-NBS-LRR class)               |
| miR482e | Solyc02g032200 | 3.5 | 18.488 | 769  | Disease resistance protein (TIR-NBS-LRR class) family        |
| miR482e | Solyc02g036270 | 3.5 | 12.267 | 681  | Disease resistance protein (NBS-LRR class) family            |
| miR482e | Solyc03g046207 | 3.5 | 24.478 | 703  | Disease resistance protein (CC-NBS-LRR class) family protein |
| miR482e | Solyc04g005540 | 3.5 | 15.547 | 852  | Disease resistance protein (NBS-LRR class) family            |
| miR482e | Solyc04g005550 | 3.5 | 18.848 | 870  | Disease resistance protein (NBS-LRR class) family            |
| miR482e | Solyc04g009120 | 3.5 | 21.183 | 601  | Nbs- <i>lrr</i> resistance protein                           |
| miR482e | Solyc04g074865 | 3.5 | 16.828 | 1400 | Retrovirus-related Pol polyprotein from transposon TNT 1-94  |
| miR482e | Solyc05g006630 | 3.5 | 29.979 | 1034 | disease resistance protein (TIR-NBS-LRR class)               |
| miR482e | Solyc07g005770 | 3.5 | 23.779 | 541  | Disease resistance protein                                   |
| miR482e | Solyc07g044790 | 3.5 | 21.329 | 1223 | Pvr4                                                         |
| miR482e | Solyc07g044797 | 3.5 | 21.329 | 286  | CC-NBS-LRR disease resistance protein                        |
| miR482e | Solyc10g051050 | 3.5 | 21.243 | 928  | Disease resistance protein                                   |
| miR482e | Solyc11g011350 | 3.5 | 20.579 | 1383 | disease resistance protein (TIR-NBS-LRR class)               |
| miR482e | Solyc11g020090 | 3.5 | 20.197 | 103  | Disease resistance protein                                   |
| miR482e | Solyc11g068360 | 3.5 | 22.83  | 622  | Disease resistance protein                                   |
| miR482e | Solyc11g069300 | 3.5 | 25.111 | 2436 | Kinase family protein                                        |
| miR482e | Solyc11g069620 | 3.5 | 21.64  | 706  | Disease resistance protein                                   |
| miR482e | Solyc11g069990 | 3.5 | 23.911 | 1218 | I2C5                                                         |
| miR482e | Solyc11g070020 | 3.5 | 23.911 | 1990 | Disease resistance protein                                   |
| miR482e | Solyc11g071423 | 3.5 | 25.798 | 229  | Disease resistance protein                                   |
| miR482e | Solyc11g071995 | 3.5 | 26.508 | 622  | Disease resistance protein                                   |
| miR482e | Solyc12g005970 | 3.5 | 15.572 | 493  | Disease resistance protein (CC-NBS-LRR class) family         |
| miR482e | Solyc12g044180 | 3.5 | 19.352 | 526  | CC-NBS-LRR disease resistance protein                        |
| miR482e | Solyc12g044190 | 3.5 | 18.858 | 526  | Disease resistance protein (CC-NBS-LRR class) family protein |
| miR482e | Solyc12g044200 | 3.5 | 18.45  | 1186 | Disease resistance protein (CC-NBS-LRR class) family protein |
| miR482e | Solyc01g087200 | 4   | 19.546 | 517  | Disease resistance protein                                   |
| miR482e | Solyc01g100310 | 4   | 14.841 | 947  | Calmodulin-binding protein                                   |
| miR482e | Solyc02g032650 | 4   | 15.288 | 798  | Disease resistance protein (TIR-NBS-LRR class)               |
| miR482e | Solyc02g073574 | 4   | 17.186 | 583  | Disease resistance protein                                   |
| miR482e | Solyc02g084450 | 4   | 17.186 | 2110 | Disease resistance protein                                   |
| miR482e | Solyc03g078300 | 4   | 20.201 | 727  | Disease resistance protein                                   |
| miR482e | Solyc04g011590 | 4   | 30.314 | 622  | Amino acid transporter                                       |
| miR482e | Solyc04g011960 | 4   | 15.415 | 523  | Disease resistance protein (CC-NBS-LRR class) family         |
| miR482e | Solyc04g011980 | 4   | 16.137 | 523  | Disease resistance protein (CC-NBS-LRR class) family         |
| miR482e | Solyc04g011990 | 4   | 15.741 | 1079 | Disease resistance protein (NBS-LRR class) family            |
| miR482e | Solyc04g012000 | 4   | 17.872 | 223  | NBS-coding resistance gene analog                            |
| miR482e | Solyc04g012010 | 4   | 18.376 | 543  | Disease resistance protein (NBS-LRR class) family            |
| miR482e | Solyc04g048920 | 4   | 15.927 | 46   | CC-NBS-LRR disease resistance protein                        |
| miR482e | Solyc08g079150 | 4   | 16.89  | 22   | SAUR-like auxin-responsive protein family                    |
| miR482e | Solyc09g007710 | 4   | 25.33  | 989  | Disease resistance protein (TIR-NBS-LRR class) family        |
| miR482e | Solyc10g055050 | 4   | 17.252 | 379  | CC-NBS-LRR disease resistance protein                        |
| miR482e | Solyc11g065780 | 4   | 21.191 | 786  | Disease resistance protein                                   |

|         |                |   |        |     |                                                              |
|---------|----------------|---|--------|-----|--------------------------------------------------------------|
| miR482e | Solyc12g005520 | 4 | 23.107 | 121 | Disease resistance protein (CC-NBS-LRR class) family         |
| miR482e | Solyc12g096920 | 4 | 17.72  | 544 | Disease resistance protein (CC-NBS-LRR class) family protein |

**Table S3. Target prediction for all siRNA-producing NLRs. Summary of sNLRs, with their gene id, class of NLR protein based on the phylogenetic analysis of a previous study (5) and not in the presence of representative domains, total counts for 21-nt sRNAs (nRPM), and targeting scores for each individual microRNA (red indicates stronger targeting prediction). *TAS5* (bottom) is added for reference.**

| General information |             |            | Target Prediction |         |         |          |          |
|---------------------|-------------|------------|-------------------|---------|---------|----------|----------|
| Gene_ID             | NLR class   | sRNA prod. | miR482b           | miR482e | miR482c | miR2118a | miR2118b |
| Solyc11g065780      | CNL         | 1159.4     | 2                 | 3       | 4       | -        | -        |
| Solyc05g008070      | CNL         | 569.4      | 1.5               | 2.5     | -       | -        | 3.5      |
| Solyc02g036270      | CNL - LRR1  | 514.6      | 1.5               | 3.5     | 3.5     | -        | 3.5      |
| Solyc04g005540      | CNL - LRR2  | 303.2      | 3.5               | 3.5     | 3.5     | -        | 4        |
| Solyc11g071995      | CNL         | 259.4      | 4                 | 3.5     | -       | -        | -        |
| Solyc04g005550      | CNL         | 129.6      | 3.5               | 3.5     | 3.5     | -        | 4        |
| Solyc10g051050      | CNL         | 128.0      | 3                 | 3.5     | -       | -        | -        |
| Solyc09g064610      | CNL         | 77.7       | -                 | -       | -       | -        | -        |
| Solyc01g008800      | TNL         | 74.7       | -                 | 3.5     | -       | 4        | -        |
| Solyc08g007630      | CNL         | 70.0       | -                 | -       | -       | -        | -        |
| Solyc05g009630      | CNL         | 66.9       | -                 | -       | -       | -        | -        |
| Solyc11g069990      | CNL         | 65.3       | 4                 | 3.5     | -       | -        | -        |
| Solyc11g069620      | CNL         | 64.9       | 3.5               | 3.5     | -       | -        | -        |
| Solyc11g069925      | CNL         | 58.4       | 3                 | 3       | -       | -        | -        |
| Solyc05g005330      | CNL         | 48.2       | -                 | -       | -       | -        | -        |
| Solyc11g068360      | CNL         | 34.4       | 3.5               | 3.5     | -       | -        | -        |
| Solyc07g049700      | CNL         | 25.0       | 3.5               | 2       | -       | -        | -        |
| Solyc11g071410      | CNL         | 23.3       | -                 | -       | -       | -        | -        |
| Solyc10g085460      | CNL         | 19.9       | -                 | -       | -       | -        | -        |
| Solyc11g011350      | TNL         | 18.2       | -                 | 3.5     | -       | 3        | -        |
| Solyc11g006640      | CNL         | 17.8       | 3.5               | 3       | -       | -        | -        |
| Solyc12g044190      | CNL         | 17.3       | 3.5               | 3.5     | -       | -        | -        |
| Solyc11g020100      | CNL         | 17.3       | 3                 | 2.5     | -       | -        | -        |
| Solyc12g044200      | CNL         | 17.2       | 3.5               | 3.5     | -       | -        | -        |
| Solyc07g005770      | CNL         | 15.5       | 3                 | 3.5     | -       | -        | 4        |
| Solyc09g018220      | CNL         | 14.7       | -                 | -       | -       | -        | -        |
| Solyc11g064770      | CNL         | 14.3       | -                 | -       | -       | -        | -        |
| Solyc02g032650      | TNL         | 14.3       | 3.5               | 4       | 3.5     | -        | 2        |
| Solyc12g006040      | CNL         | 13.7       | 4                 | 3       | -       | -        | 3.5      |
| Solyc08g076000      | CNL         | 12.5       | -                 | -       | 1.5     | -        | 2.5      |
| Solyc11g069660      | CNL         | 12.0       | -                 | -       | -       | -        | -        |
| Solyc09g098130      | CNL         | 11.1       | -                 | -       | -       | -        | -        |
| Solyc06g005410      | <b>TAS5</b> | 431.2      | -                 | -       | -       | -        | 1 / 2    |

**Table S4 Summary of degradome (PARE) signatures. Summary of validated degradome products for miR482/2118 members on the whole tomato transcriptome (p-value < 0.05). Peak category refers to PARE read abundances of that position correspond to (0) > 90th percentile, (1) > 75th, (2) > 50th percentile, (3) < 50th percentile of total PARE read signatures in the genome.**

| miRname    | Target         | Score   | Cleavage Position | Reads | Proportion of reads in 10nt window | Peak category | Corrected p-value | Annotation                                    |
|------------|----------------|---------|-------------------|-------|------------------------------------|---------------|-------------------|-----------------------------------------------|
| miR2118b/a | Solyc06g005410 | 1 / 4   | 513               | 62    | 1                                  | 0             | 0.0001/0.0058     | TAS5                                          |
| miR482b/c  | Solyc02g036270 | 1.5 / 3 | 1017              | 12    | 1                                  | 2             | 0.0058/ 0.0155    | LRR1                                          |
| miR2118b   | Solyc06g005410 | 2       | 2536              | 18    | 0.3                                | 2             | 0.0061            | TAS5                                          |
| miR482c    | Solyc04g005540 | 3       | 864               | 7     | 1                                  | 2             | 0.0155            | LRR2                                          |
| miR482e    | Solyc11g013750 | 4       | 1778              | 9     | 1                                  | 2             | 0.0401            | Disease resistance protein (NLR class) family |
| miR2118a   | Solyc06g064550 | 7       | 6499              | 8     | 1                                  | 2             | 0.042             | Aspartokinase-homoserine dehydrogenase        |
| miR482c    | Solyc06g062440 | 3.5     | 607               | 7     | 1                                  | 2             | 0.0475            | Disease resistance protein                    |
| miR2118a   | Solyc08g065220 | 7       | 4795              | 4     | 1                                  | 3             | 0.0487            | Glycine decarboxylase p-protein               |

**Table S5. Summary of phasing signatures. Top 20 phasing signatures in our sRNA dataset mapping to tomato genes. Colour code indicates when the gene is a predicted to be a preferential target of (blue) miR482 or (red) miR2118.**

| Gene ID        | Start | End  | phaseR score | Annotation                                    |
|----------------|-------|------|--------------|-----------------------------------------------|
| Solyc02g036270 | 278   | 3514 | -26.9        | LRR1                                          |
| Solyc06g005410 | 361   | 1513 | -24.6        | TAS5                                          |
| Solyc10g051050 | 938   | 2624 | -22.9        | Disease resistance protein (NLR class) family |
| Solyc09g074520 | 409   | 2264 | -21.0        | Transport inhibitor response 1 (TIR1)         |
| Solyc05g008070 | 287   | 2479 | -18.8        | Disease resistance protein (NLR class) family |
| Solyc04g005540 | 431   | 3965 | -18.3        | LRR2                                          |
| Solyc05g009630 | 701   | 2948 | -17.4        | Disease resistance protein (NLR class) family |
| Solyc11g069990 | 763   | 3397 | -16.5        | Disease resistance protein (NLR class) family |
| Solyc11g065820 | 2293  | 6253 | -16.0        | Disease resistance protein (NLR class) family |
| Solyc12g099870 | 1691  | 2072 | -15.5        | LRR RLK                                       |
| Solyc11g011350 | 780   | 3629 | -15.5        | Disease resistance protein (NLR class) family |
| Solyc06g048960 | 518   | 3675 | -15.3        | Dicer-like 2a (DCL2a)                         |
| Solyc05g051230 | 2225  | 2876 | -14.2        | MOCS3-like                                    |
| Solyc04g051190 | 154   | 1809 | -14.2        | P450 carotenoid $\beta$ -hydrolase (CYP97A29) |
| Solyc11g071995 | 506   | 3586 | -14.1        | Disease resistance protein (NLR class) family |
| Solyc11g020100 | 957   | 2602 | -14.0        | Disease resistance protein (NLR class) family |
| Solyc01g058100 | 0     | 126  | -13.9        | NAD(P)H-quinone oxidoreductase subunit K      |
| Solyc09g018220 | 562   | 2549 | -13.5        | Disease resistance protein (NLR class) family |
| Solyc02g032650 | 376   | 3091 | -13.3        | Disease resistance protein (NLR class) family |
| Solyc11g065790 | 12    | 409  | -13.2        | Disease resistance protein (NLR class) family |

**Table S6. Most significant differential sRNA loci in STTM lines. Genetic loci with differential accumulation of sRNAs (any size-class), with their gene id, annotation, log2 fold changes, direction of the change, and adjusted p-value (cut-off of 0.05). Colour code indicates when the gene is a predicted to be a preferential target of (blue) miR482 or (red) miR2118.**

**Differential sRNA loci between STTM482.1 and wild type**

| Gene ID        | Annotation                                    | Log2(FC) | Condition      | adj. p-value |
|----------------|-----------------------------------------------|----------|----------------|--------------|
| Solyc11g065780 | Disease resistance protein (NLR class) family | 1.596    | WT > STTM482.1 | 2.3E-06      |
| Solyc09g064610 | Disease resistance protein (NLR class) family | 3.255    | WT > STTM482.1 | 3.2E-05      |
| Solyc01g008790 | Non specific phospholipase C                  | 2.730    | WT > STTM482.1 | 2.3E-04      |
| Solyc01g067165 | Disease resistance protein (NLR class) family | 1.971    | WT > STTM482.1 | 3.4E-04      |
| Solyc01g008800 | Disease resistance protein (NLR class) family | 2.508    | WT > STTM482.1 | 4.5E-04      |
| Solyc04g017620 | F-box family protein                          | 2.065    | WT > STTM482.1 | 5.4E-04      |
| Solyc12g044190 | Disease resistance protein (NLR class) family | 1.924    | WT > STTM482.1 | 9.4E-04      |
| Solyc07g005770 | Disease resistance protein (NLR class) family | 2.787    | WT > STTM482.1 | 1.4E-03      |
| Solyc08g076000 | Disease resistance protein (NLR class) family | 2.336    | WT > STTM482.1 | 1.8E-03      |
| Solyc02g036270 | Disease resistance protein (NLR class) family | 1.921    | WT > STTM482.1 | 2.3E-03      |
| Solyc02g032650 | Disease resistance protein (NLR class) family | 2.140    | WT > STTM482.1 | 3.6E-03      |
| Solyc04g005550 | Disease resistance protein (NLR class) family | 2.306    | WT > STTM482.1 | 7.1E-03      |
| Solyc04g005540 | Disease resistance protein (NLR class) family | 1.751    | WT > STTM482.1 | 1.7E-02      |
| Solyc01g067147 | Asterix-like protein                          | 2.230    | WT > STTM482.1 | 3.2E-02      |
| Solyc01g100380 | Calreticulin                                  | 1.322    | WT < STTM482.1 | 1.2E-02      |
| Solyc03g112330 | U-box domain-containing kinase family protein | 1.684    | WT < STTM482.1 | 2.5E-02      |
| Solyc03g112335 | O-acyltransferase (WSD1-like) family protein  | 1.637    | WT < STTM482.1 | 4.0E-02      |
| Solyc09g097780 | Glycine-rich protein                          | 1.499    | WT < STTM482.1 | 4.8E-02      |

**Differential sRNA loci between MIM2118b and wild type**

| Gene ID        | Annotation | Log2(FC) | Condition        | adj. p-value |
|----------------|------------|----------|------------------|--------------|
| Solyc06g005410 | TAS5       | 2.168    | WT > STTM2118b.5 | 8.09E-05     |

**Table S7. Summary of sNLs. Gene id, class of NLR protein based on the phylogenetic analysis of Andolfo et al. [2014]. Total counts for 21-nt sRNAs (nRPM) in wild type (WT), STTM482.1 and STTM2118b.5 lines. Log2 fold changes between WT and STTM lines (intensity of colour indicates stronger reduction). Summary of target prediction, with letters indicating the predicted targeting miRNA. Summary of RNAseq abundances in transcript per million (TPM) and Log2 fold changes between STTM lines and WT across conditions. SlyTAS5 (bottom) is added for additional reference.**

| General information |            | small RNA Analysis |                   |             |                 |        | Target Predictions |         | RNAseq Analysis |      |        |                      |         |        |                        |         |        |  |
|---------------------|------------|--------------------|-------------------|-------------|-----------------|--------|--------------------|---------|-----------------|------|--------|----------------------|---------|--------|------------------------|---------|--------|--|
| Gene_ID             | NLR class  | WT                 | Total 21nt counts |             | Log2 difference |        | miR482             | miR2118 | Avg Exp (TPM)   |      |        | LOG2(STTM482.1 / WT) |         |        | LOG2(STTM2118b.5 / WT) |         |        |  |
|                     |            |                    | STTM482.1         | STTM2118b.5 | S4.1/W          | S2.5/W |                    |         | Young           | Old  | P. inf | Young                | Old     | P. inf | Young                  | Old     | P. inf |  |
| Solyc11g065780      | CNL        | 1159.4             | 420.5             | 1225.5      | -1.463          | 0.080  | be c               | -       | 0.0             | 0.0  | 0.0    |                      |         |        |                        |         |        |  |
| Solyc05g008070      | CNL        | 569.4              | 578.4             | 577.9       | 0.023           | 0.021  | be                 | b       | 5.1             | 6.4  | 7.4    | -0.353               | -0.395  | -0.689 | -0.349                 | -0.347  | -0.178 |  |
| Solyc02g036270      | CNL - LRR1 | 514.6              | 124.2             | 545.1       | -2.050          | 0.083  | b ec               | b       | 4.9             | 5.2  | 4.3    | 0.422                | 0.486   | 0.516  | 0.228                  | 0.180   | 0.161  |  |
| Solyc04g005540      | CNL - LRR2 | 303.2              | 78.5              | 349.7       | -1.949          | 0.206  | bec                | b       | 8.9             | 15.1 | 14.7   | 0.237                | 0.299   | 0.273  | -0.064                 | 0.087   | -0.039 |  |
| Solyc11g071995      | CNL        | 259.4              | 338.2             | 291.3       | 0.382           | 0.167  | be                 | -       | 6.1             | 11.2 | 6.6    | 0.167                | 0.052   | 0.400  | -0.166                 | 0.113   | -0.061 |  |
| Solyc04g005550      | CNL        | 129.6              | 24.1              | 150.8       | -2.429          | 0.219  | bec                | b       | 3.3             | 10.0 | 13.7   | -0.140               | -0.468  | 0.133  | 0.227                  | -0.622  | -0.140 |  |
| Solyc10g051050      | CNL        | 128.0              | 131.0             | 146.7       | 0.034           | 0.197  | b e                | -       | 1.3             | 1.9  | 2.6    | -0.163               | -0.705  | 0.533  | 0.085                  | -0.767  | -0.039 |  |
| Solyc09g064610      | CNL        | 77.7               | 7.9               | 83.9        | -3.296          | 0.111  | -                  | -       | 6.1             | 8.1  | 5.5    | -0.230               | -0.645  | -0.172 | 0.045                  | -0.441  | -0.197 |  |
| Solyc01g008800      | TNL        | 74.7               | 11.2              | 82.8        | -2.738          | 0.148  | e                  | a       | 1.2             | 8.2  | 12.9   | 0.009                | -0.263  | 0.288  | 0.121                  | -0.848  | 0.067  |  |
| Solyc08g007630      | CNL        | 70.0               | 48.9              | 78.6        | -0.518          | 0.167  | -                  | -       | 5.1             | 9.4  | 2.3    | 0.137                | -0.217  | 1.148  | 0.138                  | -0.151  | 0.281  |  |
| Solyc05g009630      | CNL        | 66.9               | 67.5              | 71.9        | 0.013           | 0.103  | -                  | -       | 17.4            | 33.5 | 15.2   | -0.044               | -0.067  | 0.868  | 0.056                  | -0.154  | 0.756  |  |
| Solyc11g069990      | CNL        | 65.3               | 56.2              | 61.3        | -0.217          | -0.091 | be                 | -       | 2.8             | 4.0  | 1.8    | 0.055                | -0.192  | 1.019  | 0.231                  | 0.056   | 0.445  |  |
| Solyc11g069620      | CNL        | 64.9               | 36.1              | 72.4        | -0.845          | 0.158  | be                 | -       | 3.7             | 6.9  | 2.4    | 0.193                | 0.068   | 1.390  | -0.027                 | -0.208  | 0.622  |  |
| Solyc11g069925      | CNL        | 58.4               | 47.0              | 58.9        | -0.314          | 0.012  | be                 | -       | 3.2             | 6.7  | 4.0    | 0.170                | 0.085   | 1.009  | -0.100                 | -0.122  | 0.496  |  |
| Solyc05g005330      | CNL        | 48.2               | 47.1              | 38.3        | -0.032          | -0.329 | -                  | -       | 6.8             | 8.8  | 5.2    | -0.285               | -0.080  | 0.309  | -0.175                 | 0.095   | 0.099  |  |
| Solyc11g068360      | CNL        | 34.4               | 24.0              | 33.6        | -0.523          | -0.036 | be                 | -       | 1.9             | 4.6  | 1.1    | 0.361                | -0.113  | 1.133  | 0.252                  | 0.294   | 0.283  |  |
| Solyc07g049700      | CNL        | 25.0               | 22.8              | 28.7        | -0.129          | 0.200  | b e                | -       | 0.5             | 2.3  | 8.8    | -0.664               | -0.140  | -0.205 | 0.470                  | -1.055  | -0.168 |  |
| Solyc11g071410      | CNL        | 23.3               | 27.1              | 26.6        | 0.215           | 0.186  | -                  | -       | 2.1             | 4.4  | 2.9    | 0.394                | 0.142   | -0.087 | -0.189                 | 0.223   | -0.098 |  |
| Solyc10g085460      | CNL        | 19.9               | 18.4              | 13.7        | -0.114          | -0.532 | -                  | -       | 16.0            | 22.0 | 17.4   | -0.089               | 0.025   | 0.829  | 0.036                  | -0.058  | 0.569  |  |
| Solyc11g011350      | TNL        | 18.2               | 21.7              | 25.8        | 0.252           | 0.504  | e                  | a       | 1.0             | 1.7  | 2.1    | -0.210               | 0.164   | 0.614  | 0.123                  | -0.242  | 0.587  |  |
| Solyc11g006640      | CNL        | 17.8               | 14.4              | 19.5        | -0.305          | 0.132  | b e                | -       | 4.3             | 5.0  | 1.7    | 0.645                | 0.566   | 1.325  | 0.094                  | 0.261   | 0.570  |  |
| Solyc12g044190      | CNL        | 17.3               | 4.4               | 17.9        | -1.974          | 0.047  | be                 | -       | 3.8             | 10.8 | 6.2    | 0.504                | -0.090  | 0.868  | -0.293                 | 0.175   | 0.196  |  |
| Solyc11g020100      | CNL        | 17.3               | 16.1              | 15.8        | -0.108          | -0.128 | be                 | -       | 1.3             | 8.1  | 4.9    | 0.290                | -0.153  | 0.303  | 0.409                  | -0.374  | -0.082 |  |
| Solyc12g044200      | CNL        | 17.2               | 5.1               | 17.3        | -1.758          | 0.012  | be                 | -       | 5.3             | 4.0  | 0.9    | -0.215               | -0.027  | 0.856  | -0.061                 | 0.536   | 1.031  |  |
| Solyc07g005770      | CNL        | 15.5               | 2.3               | 15.2        | -2.780          | -0.028 | b e                | b       | 1.2             | 1.2  | 0.4    | -0.098               | 0.252   | 1.079  | -0.204                 | 0.565   | 0.832  |  |
| Solyc09g018220      | CNL        | 14.7               | 16.8              | 6.4         | 0.200           | -1.196 | -                  | -       | 1.0             | 1.5  | 2.3    | -0.894               | -0.150  | 0.341  | -0.351                 | -0.580  | -0.074 |  |
| Solyc11g064770      | CNL        | 14.3               | 5.9               | 16.6        | -1.284          | 0.215  | -                  | -       | 0.0             | 0.0  | 0.0    |                      |         |        |                        |         |        |  |
| Solyc02g032650      | TNL        | 14.3               | 3.1               | 14.1        | -2.214          | -0.023 | bec                | b       | 0.7             | 7.0  | 10.5   | 1.264                | 0.372   | 0.882  | 1.0151                 | 0.0349  | 0.799  |  |
| Solyc12g006040      | CNL        | 13.7               | 11.5              | 5.7         | -0.258          | -1.261 | b e                | b       | 0.3             | 1.0  | 5.4    | 0.308                | -0.334  | 0.292  | -0.1123                | -0.4187 | 0.105  |  |
| Solyc08g076000      | CNL        | 12.5               | 2.2               | 12.2        | -2.526          | -0.033 | c                  | b       | 0.9             | 1.1  | 1.4    | -0.141               | 0.231   | -0.017 | -0.2096                | -0.0822 | 0.123  |  |
| Solyc11g069660      | CNL        | 12.0               | 6.1               | 13.2        | -0.977          | 0.132  | -                  | -       | 3.5             | 2.0  | 0.2    | -0.279               | -0.828  | 0.929  | 0.0269                 | 0.2589  | 0.208  |  |
| Solyc09g098130      | CNL        | 11.1               | 11.9              | 12.0        | 0.101           | 0.108  | -                  | -       | 3.0             | 1.9  | 4.8    | -0.554               | -0.016  | -0.602 | -0.0318                | -0.0852 | -0.514 |  |
| Solyc06g005410      | TAS5       | 431.2              | 342.2             | 83.8        | -0.334          | -2.363 | -                  | b       | 2.1             | 5.2  | 7.7    | 0.1841               | -0.0324 | 0.016  | 0.4292                 | 0.5832  | 0.759  |  |







|                |       |        |        |        |        |        |        |                                                           |
|----------------|-------|--------|--------|--------|--------|--------|--------|-----------------------------------------------------------|
| Solyc03g116960 | WT<S2 | 0.04   | 0.07   | 0.08   | 0.22   | 0.00   | 0.14   | LOW QUALITY:Pentatricopeptide repeat                      |
| Solyc04g009190 | WT<S2 | 0.60   | 1.32   | 1.36   | 2.76   | 1.96   | 4.20   | UPF0664 stress-induced protein C29B12.11c                 |
| Solyc04g051780 | WT<S2 | 27.63  | 36.36  | 40.03  | 70.75  | 24.71  | 50.43  | Programmed cell death protein 2-like protein              |
| Solyc04g071150 | WT<S2 | 3.58   | 14.01  | 17.12  | 29.55  | 0.77   | 1.16   | Cytochrome P450 family protein                            |
| Solyc05g021163 | WT<S2 | 0.00   | 0.03   | 0.00   | 1.02   | 0.00   | 0.48   | ubiquitin-conjugating enzyme 34                           |
| Solyc05g021180 | WT<S2 | 0.00   | 0.18   | 0.00   | 5.49   | 0.00   | 2.92   | Pyridoxal-5'-phosphate-dependent enzyme family protein    |
| Solyc05g024190 | WT<S2 | 0.39   | 9.76   | 1.46   | 11.11  | 0.64   | 4.85   | Chlorophyll synthase                                      |
| Solyc05g041770 | WT<S2 | 0.08   | 0.06   | 0.81   | 3.02   | 0.81   | 5.32   | Guanylate-binding family protein                          |
| Solyc05g053965 | WT<S2 | 0.21   | 0.67   | 1.78   | 2.55   | 0.36   | 1.95   | Amino acid transporter                                    |
| Solyc05g054010 | WT<S2 | 0.02   | 0.21   | 0.15   | 1.23   | 0.19   | 4.70   | NBS-LRR resistance protein-like protein                   |
| Solyc05g055400 | WT<S2 | 116.91 | 89.27  | 51.20  | 97.52  | 14.50  | 38.05  | Cytochrome P450                                           |
| Solyc06g005410 | WT<S2 | 4.85   | 6.63   | 16.20  | 20.85  | 20.45  | 37.26  | TAS5                                                      |
| Solyc06g008235 | WT<S2 | 0.13   | 0.55   | 0.41   | 3.61   | 0.48   | 4.44   | NDH-dependent cyclic electron flow 5                      |
| Solyc06g075520 | WT<S2 | 0.58   | 2.09   | 1.31   | 1.95   | 0.81   | 2.11   | Dehydroascorbate reductase                                |
| Solyc06g075513 | WT<S2 | 0.13   | 0.41   | 0.27   | 0.48   | 0.10   | 0.36   | Dehydroascorbate reductase                                |
| Solyc06g076540 | WT<S2 | 0.00   | 0.11   | 0.03   | 0.33   | 0.02   | 0.45   | Class I heat shock protein                                |
| Solyc07g026710 | WT<S2 | 0.00   | 0.00   | 0.35   | 2.03   | 0.10   | 0.74   | Transposon protein                                        |
| Solyc07g055460 | WT<S2 | 0.04   | 3.33   | 2.64   | 44.05  | 5.33   | 50.18  | Cytochrome P450                                           |
| Solyc07g063320 | WT<S2 | 0.28   | 1.86   | 0.97   | 2.85   | 0.43   | 2.97   | LanC-like protein 2                                       |
| Solyc08g015680 | WT<S2 | 0.00   | 0.76   | 0.00   | 0.81   | 0.00   | 1.50   | Potassium transporter                                     |
| Solyc08g044280 | WT<S2 | 7.91   | 19.03  | 13.15  | 16.02  | 10.81  | 30.59  | Adenine nucleotide alpha hydrolase-like domain kinase     |
| Solyc08g023340 | WT<S2 | 0.00   | 0.22   | 0.06   | 1.52   | 0.46   | 5.73   | Lectin                                                    |
| Solyc08g022130 | WT<S2 | 0.00   | 0.27   | 0.26   | 1.40   | 0.00   | 0.67   | F-box-like/WD repeat-containing protein TBL1XR1           |
| Solyc08g062220 | WT<S2 | 65.65  | 368.55 | 445.59 | 663.20 | 69.48  | 149.57 | Glycosyltransferase                                       |
| Solyc08g062290 | WT<S2 | 6.35   | 25.05  | 13.76  | 29.24  | 5.74   | 17.16  | Light-independent protochlorophyllide reductase subunit B |
| Solyc08g065590 | WT<S2 | 0.00   | 6.94   | 0.83   | 15.58  | 1.95   | 32.66  | Vacuolar processing enzyme                                |
| Solyc08g065600 | WT<S2 | 0.00   | 0.65   | 0.12   | 2.15   | 0.29   | 3.47   | Vacuolar-processing enzyme                                |
| Solyc08g065720 | WT<S2 | 0.01   | 0.06   | 0.00   | 0.19   | 0.00   | 0.30   | Vacuolar processing enzyme                                |
| Solyc08g066920 | WT<S2 | 0.12   | 0.26   | 0.33   | 0.70   | 0.16   | 0.83   | ATP/ADP transporter                                       |
| Solyc08g082545 | WT<S2 | 0.05   | 0.19   | 0.10   | 0.25   | 0.01   | 0.06   | LOW QUALITY:Peroxidase                                    |
| Solyc09g011030 | WT<S2 | 14.51  | 20.73  | 15.45  | 20.44  | 7.81   | 15.58  | Hsp70-binding protein 1                                   |
| Solyc09g011990 | WT<S2 | 0.24   | 1.19   | 1.30   | 3.86   | 8.59   | 9.70   | Clade IV lectin receptor kinase                           |
| Solyc09g018610 | WT<S2 | 0.00   | 3.68   | 0.00   | 17.25  | 0.00   | 9.20   | Mitochondrial ATP synthase subunit G protein              |
| Solyc09g031528 | WT<S2 | 0.24   | 0.13   | 1.34   | 4.42   | 1.59   | 6.83   | 3-oxoacyl-[acyl-carrier-protein] synthase                 |
| Solyc09g056185 | WT<S2 | 0.03   | 0.64   | 0.01   | 0.88   | 0.04   | 0.49   | HAT family dimerisation domain containing protein         |
| Solyc09g066030 | WT<S2 | 0.00   | 0.40   | 0.00   | 0.30   | 0.00   | 1.29   | Homeobox leucine zipper protein                           |
| Solyc11g021360 | WT<S2 | 11.36  | 51.96  | 23.05  | 73.35  | 7.78   | 12.61  | Protease Do-like 7                                        |
| Solyc12g005070 | WT<S2 | 2.55   | 3.74   | 2.41   | 3.07   | 0.87   | 1.13   | CASP-like protein                                         |
| Solyc12g042800 | WT<S2 | 0.02   | 0.13   | 0.17   | 1.53   | 0.01   | 0.59   | dsRNA-binding domain-like superfamily protein             |
| Solyc01g067030 | WT>S2 | 11.23  | 6.17   | 13.41  | 6.83   | 7.36   | 7.66   | F-box associated interaction domain-containing protein    |
| Solyc02g088240 | WT>S2 | 1.02   | 0.78   | 5.65   | 1.17   | 21.94  | 8.06   | Phosphate transporter PHO1-like protein                   |
| Solyc03g007395 | WT>S2 | 6.99   | 3.71   | 11.28  | 4.96   | 5.91   | 3.15   | Photosystem I P700 chlorophyll a apoprotein A1            |
| Solyc03g007400 | WT>S2 | 0.45   | 0.22   | 1.01   | 0.39   | 0.54   | 0.20   | Galactose oxidase/kelch repeat superfamily protein        |
| Solyc03g025150 | WT>S2 | 75.83  | 57.68  | 139.97 | 97.48  | 151.73 | 160.98 | Dentin sialophosphoprotein-related                        |
| Solyc03g036480 | WT>S2 | 0.02   | 0.00   | 3.64   | 0.12   | 0.89   | 0.18   | Phenylalanine ammonia-lyase                               |
| Solyc03g036473 | WT>S2 | 0.00   | 0.00   | 8.42   | 0.00   | 1.63   | 0.09   | Phenylalanine ammonia-lyase                               |
| Solyc04g050220 | WT>S2 | 5.97   | 3.09   | 6.00   | 1.70   | 3.29   | 1.01   | F-box associated interaction domains-containing protein   |
| Solyc05g040050 | WT>S2 | 9.88   | 7.47   | 17.16  | 12.18  | 19.68  | 19.73  | DnaJ domain-containing protein                            |
| Solyc05g052470 | WT>S2 | 6.92   | 2.91   | 44.28  | 25.40  | 42.22  | 37.22  | Ferritin                                                  |
| Solyc05g055730 | WT>S2 | 17.18  | 7.77   | 0.74   | 1.05   | 15.15  | 5.44   | Methylenetetrahydrofolate reductase                       |
| Solyc06g009170 | WT>S2 | 6.69   | 3.06   | 61.28  | 41.04  | 53.43  | 48.01  | Epoxide hydrolase                                         |
| Solyc06g063090 | WT>S2 | 1.18   | 0.92   | 3.92   | 1.59   | 31.57  | 21.92  | alanine aminotransferase 2                                |
| Solyc08g077460 | WT>S2 | 10.94  | 6.91   | 16.99  | 10.73  | 35.92  | 30.16  | SBP                                                       |
| Solyc11g071770 | WT>S2 | 14.77  | 10.26  | 25.75  | 17.13  | 36.76  | 38.65  | Translation elongation factor                             |
| Solyc12g005060 | WT>S2 | 0.25   | 0.02   | 2.04   | 0.93   | 1.61   | 1.76   | ATP synthase gamma-subunit                                |
| Solyc12g036727 | WT>S2 | 0.19   | 0.01   | 0.63   | 0.15   | 0.77   | 0.10   | NADH-ubiquinone oxidoreductase chain 5                    |

Table S9. Oligonucleotide sequences used in this study.

| Experiment      | Name                      | Sequence (5'-3')                                                                                                               |
|-----------------|---------------------------|--------------------------------------------------------------------------------------------------------------------------------|
| Northern blot   | <i>sly-miR168</i>         | GTCCCGACCTGCACCAAGCGA                                                                                                          |
|                 | <i>sly-U6</i>             | GGCCATGCTAATCTTCTGTATCGTT                                                                                                      |
|                 | <i>sly-miR482e</i>        | GGTATGGGAGGAGTAGGAAAGA                                                                                                         |
|                 | <i>sly-miR482b (LNA)</i>  | GGCATGGGCGGTGTAGGCAAGA                                                                                                         |
|                 | <i>sly-miR2118a</i>       | TAGGAATGGGTGGAATTGGAAA                                                                                                         |
|                 | <i>sly-miR2118b (LNA)</i> | TTGGCATGGGTGGAATAGGAAA                                                                                                         |
| qRT-PCR         | <i>TAS5_qPCR_1_F</i>      | GGTTTGGTTCGGGTTGTTTA                                                                                                           |
|                 | <i>TAS5_qPCR_1_R</i>      | TCAACATTGCTTCCCACTTT                                                                                                           |
|                 | <i>LRR2_qRT_B_F</i>       | CTAGCGAAGCGTGGTCTTGA                                                                                                           |
|                 | <i>LRR2_qRT_B_R</i>       | TGAGCACAAAAGAGTTGTAGCTT                                                                                                        |
|                 | <i>EXP_qPCR_F</i>         | GCTAAGAACGCTGGACCTAATG                                                                                                         |
|                 | <i>EXP_qPCR_R</i>         | TGGGTGTGCCTTTCTGAATG                                                                                                           |
| RT-PCR          | <i>mimicry_482_F</i>      | AAGGCATGGGCGGCACTGT                                                                                                            |
|                 | <i>mimicry_482_R</i>      | GAATTCTCTTCTACTATGC                                                                                                            |
|                 | <i>mimicry_2118b_F</i>    | ACCAATTGGCATGGGTGATA                                                                                                           |
|                 | <i>mimicry_2118b_R</i>    | GAATTCTTCTATTCAAGTCA                                                                                                           |
| Mimicry cloning | <i>miR2118b_mimic_Fw</i>  | CACCAATTGGCATGGGTGATAGAATAGGAAAGTTGTTGTTGTTATGGTCTAATTT...<br>...AAATATGGTCTAAAGAAGAAGAATTTGGCATGGGTGACTGAATAGGAAAGAATTC       |
|                 | <i>miR2118b_mimic_Rv</i>  | GAATTCTTCTCTATTCAAGTCAAGTCAAGTCAAGTCAAGTCAAGTCAAGTCAAGTCAAGT...<br>...AAATTAGACCATAACAACAACAACCTTCTCTATTCTATCACCCATGCCAATTGGTG |
|                 | <i>miR482_mimic_Fw</i>    | CACCAAGGCATGGGCGGCACTGTAGGCAAGAGTTGTTGTTGTTATGGTCTAATTT...<br>...AAATATGGTCTAAAGAAGAAGAATGGTATGGGAGGCATAGTAGGAAAGAGAATTC       |
|                 | <i>miR482_mimic_Rv</i>    | GAATTCTTCTCTACTATGCCTCCCATACCATTCTTCTTTAGACCATATTTAAA...<br>...TTAGACCATAACAACAACAACCTTGCCTACAGTGCCGCCCATGCCTTGGTG             |

76 **References**

- 77 1. Van Eck J, Kirk DD, Walmsley AM (2006) Tomato (*Lycopersicon esculentum*). *Methods in molecular biology (Clifton,*  
78 *N.J.)* 343:459–73.
- 79 2. Yan J, et al. (2012) Effective small RNA destruction by the expression of a short tandem target mimic in Arabidopsis.  
80 *The Plant Cell* 24(2):415–427.
- 81 3. Kozomara A, Griffiths-Jones S (2013) miRBase: annotating high confidence microRNAs using deep sequencing data.  
82 *Nucleic acids research* 42(D1):D68—D73.
- 83 4. Srivastava PK, Moturu TR, Pandey P, Baldwin IT, Pandey SP (2014) A comparison of performance of plant miRNA  
84 target prediction tools and the characterization of features for genome-wide target prediction. *BMC Genomics* 15(1):348.
- 85 5. Andolfo G, et al. (2014) Defining the full tomato NB-LRR resistance gene repertoire using genomic and cDNA RenSeq.  
86 *BMC Plant Biology* 14(1):120.
- 87 6. Kakrana A, Hammond R, Patel P, Nakano M, Meyers BC (2014) sPARTA: a parallelized pipeline for integrated analysis  
88 of plant miRNA and cleaved mRNA data sets, including new miRNA target-identification software. *Nucleic acids research*  
89 42(18):e139—e139.
- 90 7. Mohorianu I, et al. (2011) Profiling of short RNAs during fleshy fruit development reveals stage-specific sRNAome  
91 expression patterns. *The Plant Journal* 67(2):232–246.
- 92 8. Hardcastle TJ, Kelly KA, Baulcombe DC (2012) Identifying small interfering RNA loci from high-throughput sequencing  
93 data. *Bioinformatics* 28(4):457–463.
- 94 9. Hardcastle TJ, Kelly KA (2013) Empirical Bayesian analysis of paired high-throughput sequencing data with a beta-  
95 binomial distribution. *BMC Bioinformatics* 14(1):135.
- 96 10. Kamoun S, Van West P, Vleeshouwers VGAA, De Groot KE, Govers F (1998) Resistance of *Nicotiana benthamiana* to  
97 *Phytophthora infestans* Is Mediated by the Recognition of the Elicitor Protein INF1, Technical report.
- 98 11. Liu X, et al. (2015) Bacterial leaf infiltration assay for fine characterization of plant defense responses using the Arabidopsis  
99 thaliana-Pseudomonas syringae Pathosystem. *JoVE (Journal of Visualized Experiments)* (104):e53364—e53364.
- 100 12. Bray NL, Pimentel H, Melsted P, Pachter L (2016) Near-optimal probabilistic RNA-seq quantification. *Nature Biotechnology*  
101 34(5):525–527.
- 102 13. Ritchie ME, et al. (2015) limma powers differential expression analyses for rna-sequencing and microarray studies. *Nucleic*  
103 *acids research* 43(7):e47–e47.
- 104 14. Ron M, Avni A (2004) The receptor for the fungal elicitor ethylene-inducing xylanase is a member of a resistance-like gene  
105 family in tomato. *The Plant Cell* 16(6):1604–1615.
- 106 15. Roylawar P, Panda S, Kamble A (2015) Comparative analysis of baba and piriformospora indica mediated priming of  
107 defence-related genes in tomato against early blight. *Physiological and Molecular Plant Pathology* 91:88–95.
- 108 16. Xue DQ, et al. (2017) Transcriptome analysis of the cf-12-mediated resistance response to cladosporium fulvum in tomato.  
109 *Frontiers in plant science* 7:2012.
- 110 17. Thara VK, Tang X, Gu YQ, Martin GB, Zhou JM (1999) Pseudomonas syringae pv tomato induces the expression of  
111 tomato erebp-like genes pti4 and pti5 independent of ethylene, salicylate and jasmonate. *The Plant Journal* 20(4):475–483.
- 112 18. Zhang Y, Fan W, Kinkema M, Li X, Dong X (1999) Interaction of npr1 with basic leucine zipper protein transcription  
113 factors that bind sequences required for salicylic acid induction of the pr-1 gene. *Proceedings of the National Academy of*  
114 *Sciences* 96(11):6523–6528.
- 115 19. Pombo MA, et al. (2014) Transcriptomic analysis reveals tomato genes whose expression is induced specifically during  
116 effector-triggered immunity and identifies the epk1 protein kinase which is required for the host response to three bacterial  
117 effector proteins. *Genome biology* 15(10):1.
- 118 20. Du J, et al. (2015) Elicitor recognition confers enhanced resistance to *Phytophthora infestans* in potato. *Nat*  
119 *Plants* 1(4):15034.
- 120 21. Nguyen HP, et al. (2010) Methods to study pamp-triggered immunity using tomato and nicotiana benthamiana. *Molecular*  
121 *Plant-Microbe Interactions* 23(8):991–999.
- 122 22. Zhang Y, Xia R, Kuang H, Meyers BC (2016) The diversification of plant NBS-LRR defense genes directs the evolution of  
123 microRNAs that target them. *Molecular biology and evolution* 33(10):2692–2705.
- 124 23. De Vries S, Kloesges T, Rose LE (2015) Evolutionarily dynamic, but robust, targeting of resistance genes by the  
125 miR482/2118 gene family in the solanaceae. *Genome Biology and Evolution* 7(12):3307–3321.
- 126 24. Shivaprasad PV, et al. (2012) A microRNA superfamily regulates nucleotide binding site–leucine-rich repeats and other  
127 mRNAs. *The Plant Cell* 24(3):859–874.
- 128 25. Karlova R, et al. (2013) Identification of microRNA targets in tomato fruit development using high-throughput sequencing  
129 and degradome analysis. *Journal of experimental botany* 64(7):1863–1878.
